# Supplementary material for: Stereoselective Synthesis of the Di-Spirooxindole Analogs Based Oxindole and Cyclohexanone Moieties as Potential Anticancer Agents
Source: MDPI journal article supplement (doi:10.3390/molecules26206305), 2021-10-19
Supplement: s1 [file s1]

## Supporting Information

# Stereoselective Synthesis of the Di-Spirooxindole Analogs Based Oxindole and Cyclohexanone Moieties as Potential Anticancer Agents

Abdullah Mohammed Al-Majid <sup>1</sup>, M. Ali <sup>1</sup>, Mohammad Shahidul Islam <sup>1</sup>, Saeed Alshahrani <sup>1</sup>,  
Abdullah Saleh Alamary <sup>1</sup>, Sammer Yousuf <sup>2</sup>, M. Iqbal Choudhary<sup>2</sup>, and Assem Barakat <sup>1,3,\*</sup>

<sup>1</sup> Department of Chemistry, College of Science, King Saud University, P. O. Box 2455, Riyadh 11451, Saudi Arabia; Emails: amajid@ksu.edu.sa (A.M.A.-M.); maly.c@ksu.edu.sa (M.A.); mislam@ksu.edu.sa (M.S.I.); chemistry99y@gmail.com (S.A.); alamary1401@yahoo.com (A.S.A.).

<sup>2</sup> H.E.J. Research Institute of Chemistry, International Center for Chemical and Biological Sciences, University of Karachi, Karachi 75270, Pakistan; dr.sammer.yousuf@gmail.com (S.Y.); iqbal.choudhary@iccs.edu (M.I.C.)

<sup>3</sup> Department of Chemistry, Faculty of Science, Alexandria University, P.O. Box 426, Ibrahimia, Alexandria 21321, Egypt.

\* Correspondence: ambarakat@ksu.edu.sa; Tel.: +966-11467-5901; Fax: +966-11467-5992

## NMR SPECTRA

**Figure S1:**  $^1\text{H}$ -NMR and  $^{13}\text{C}$ -NMR for compound-4a

AB1171\_1H

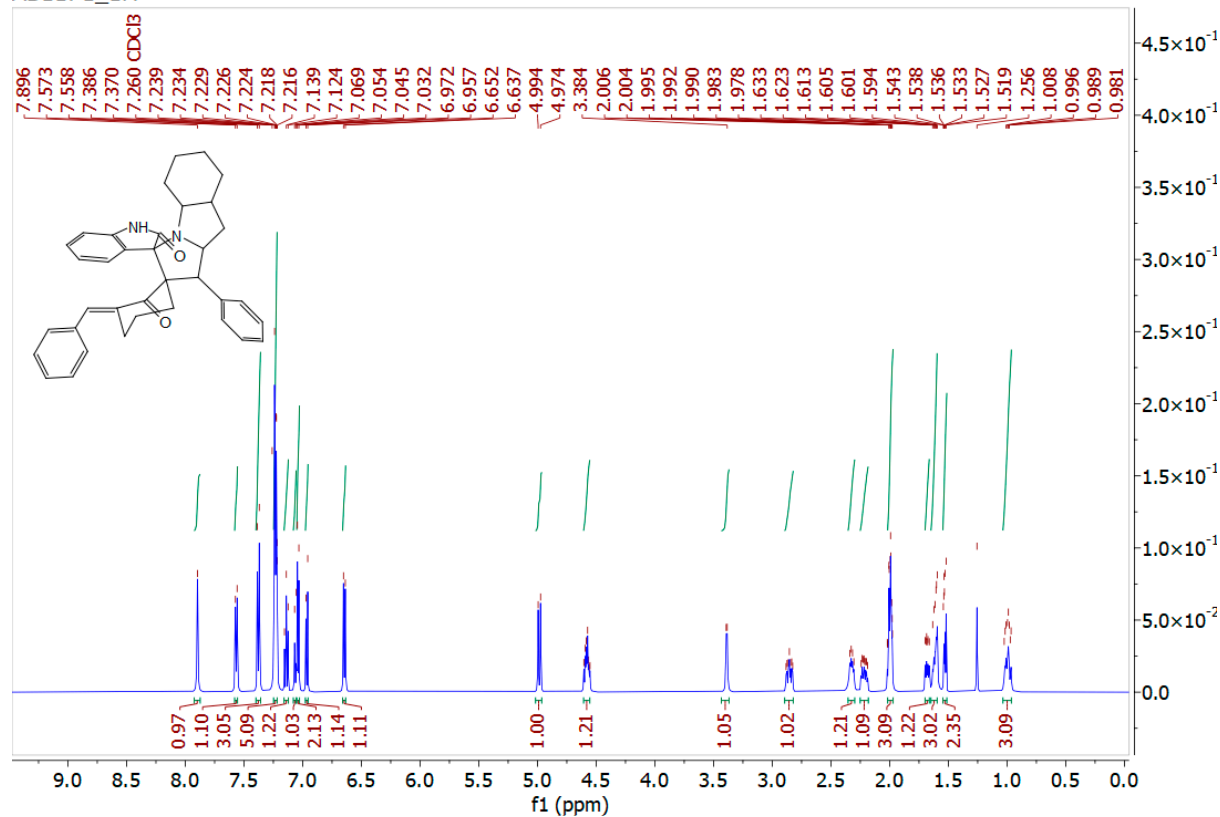

AB1171\_13C

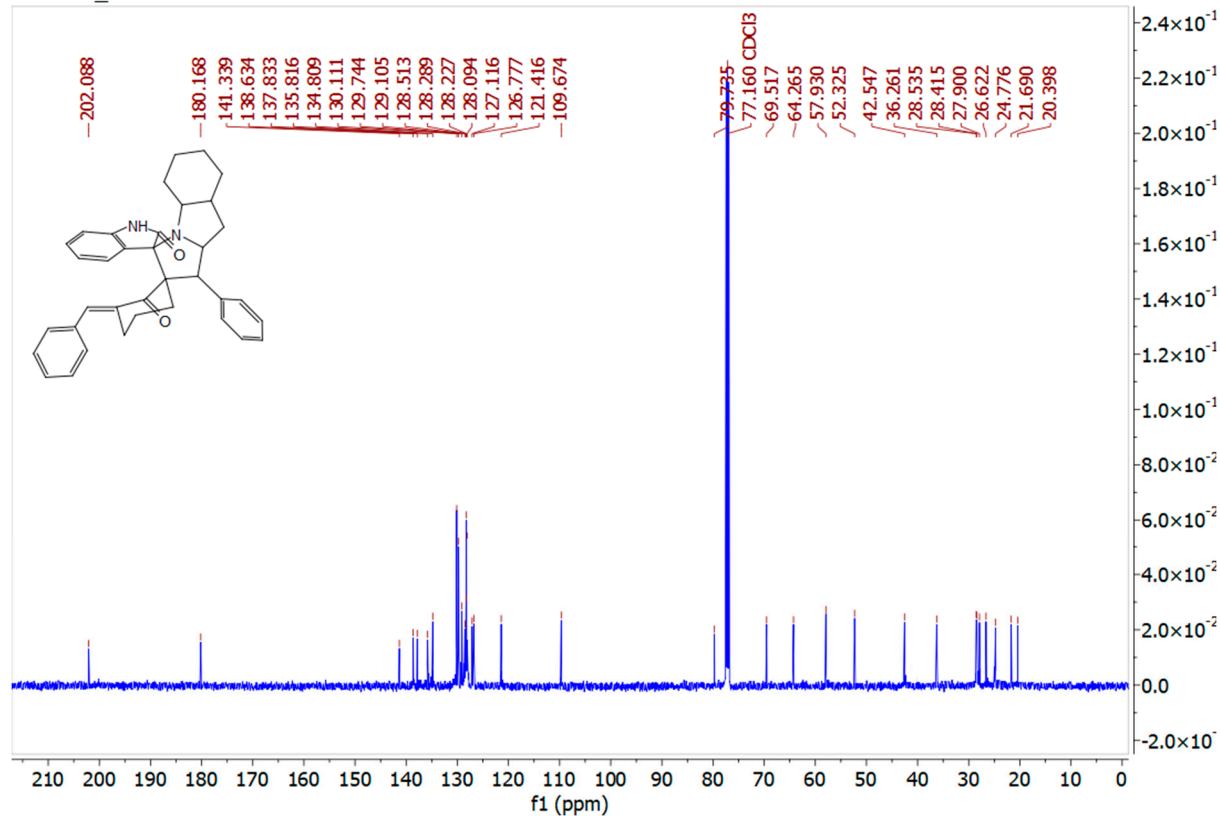

**Figure S2:**  $^1\text{H}$ -NMR and  $^{13}\text{C}$ -NMR for compound-4b

AB1172\_1H

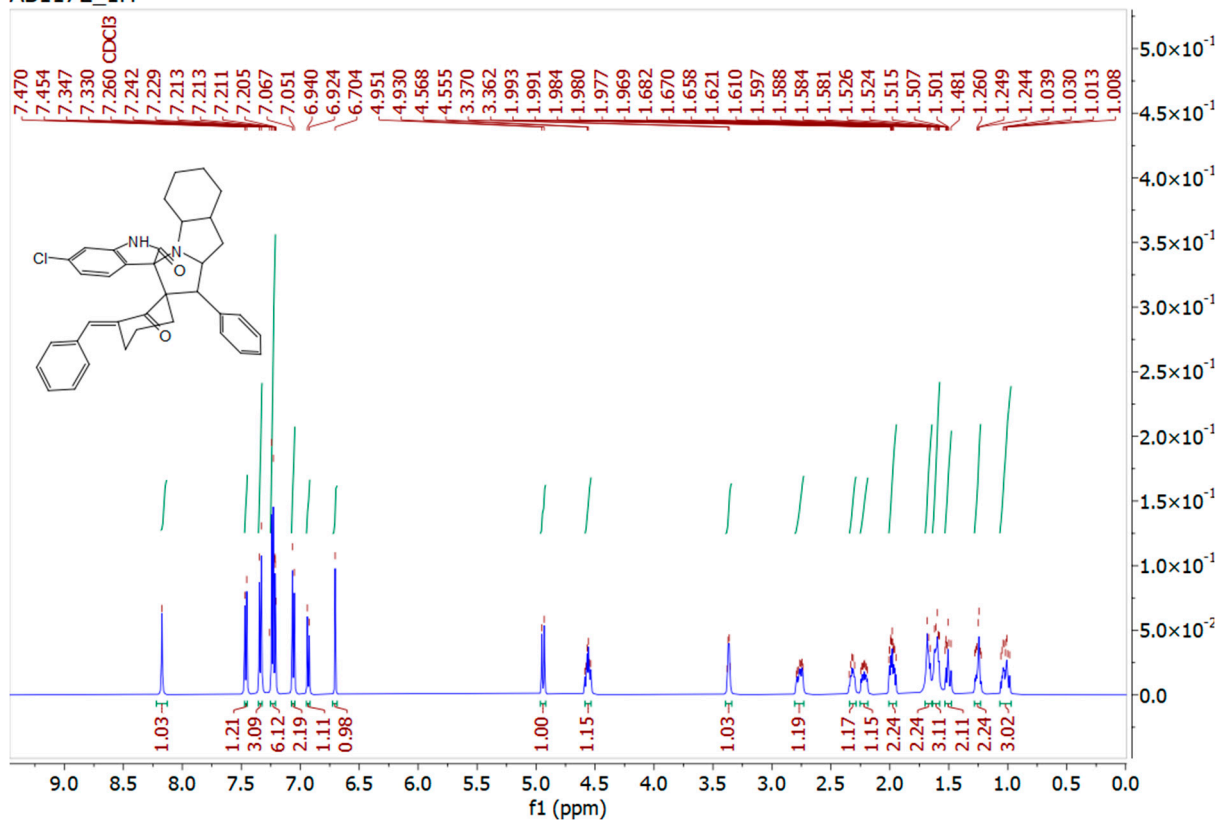

AB1172\_13C

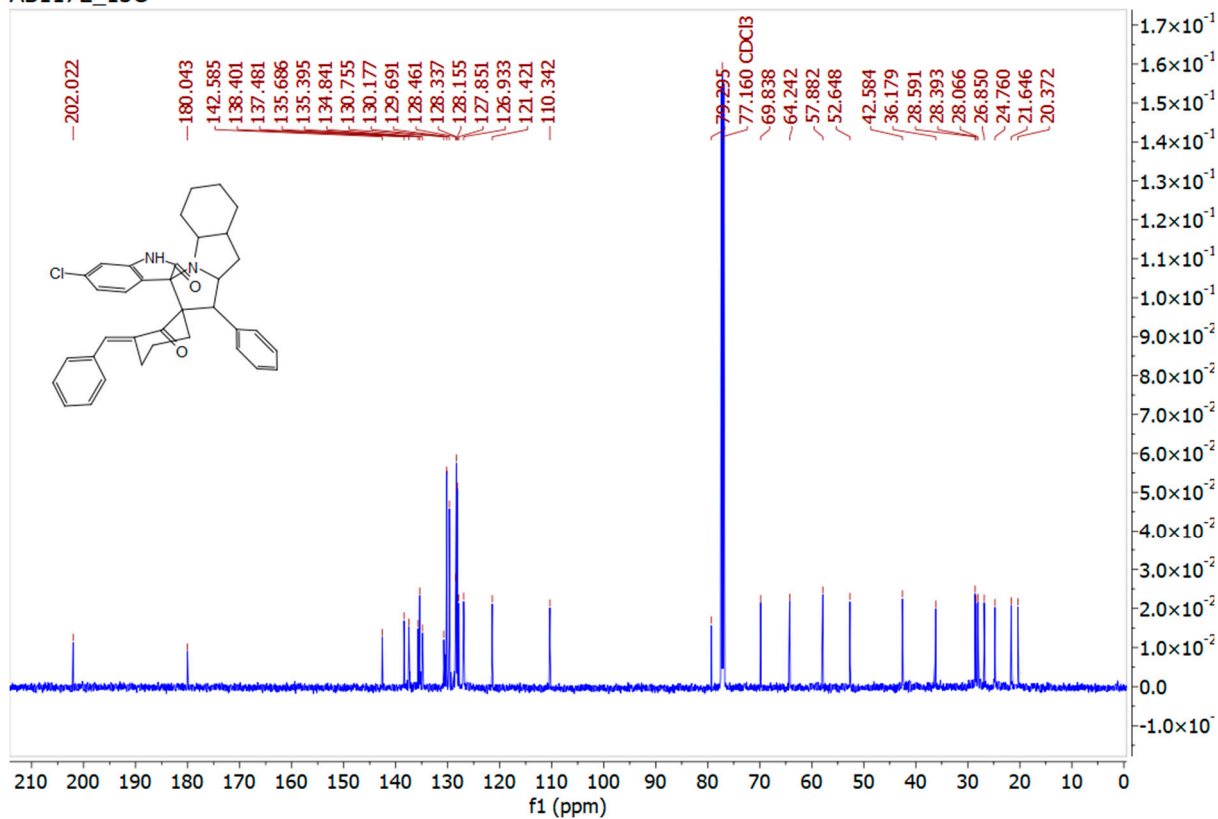

**Figure S3:**  $^1\text{H}$ -NMR and  $^{13}\text{C}$ -NMR for compound-4c

AB1173\_1H

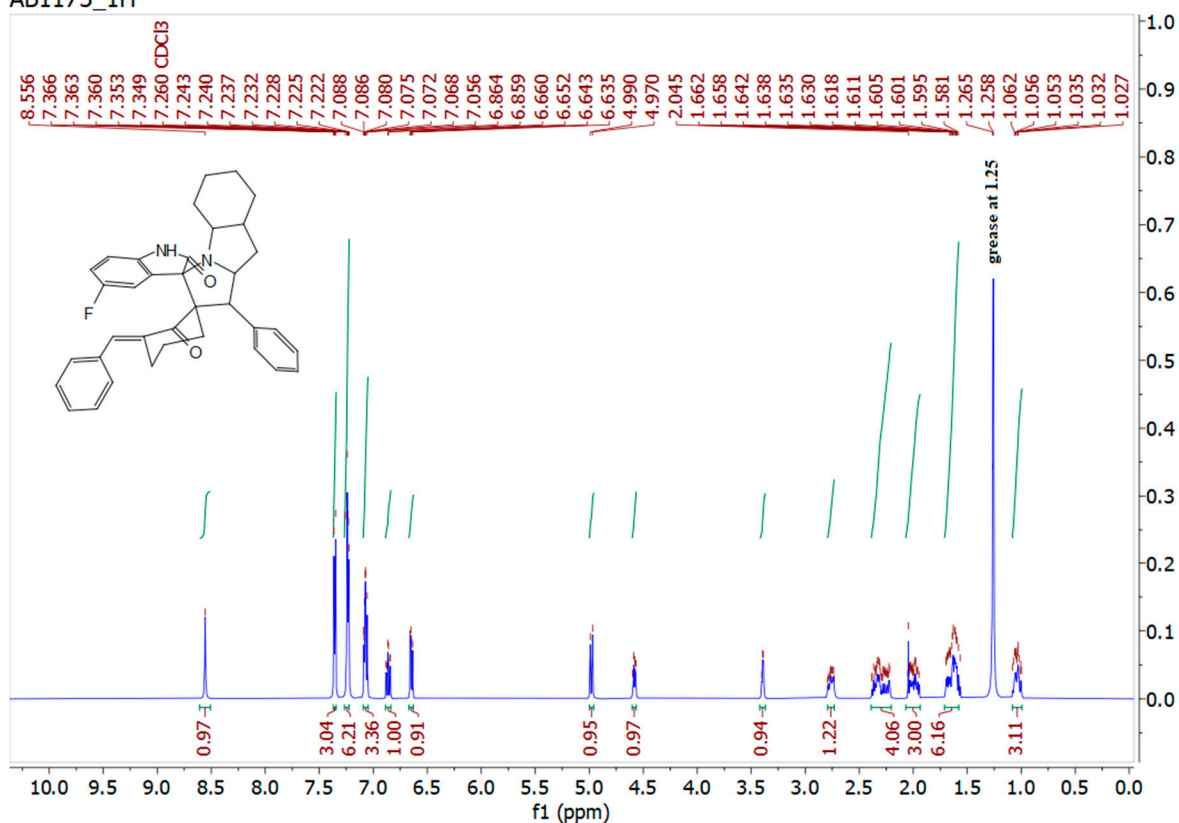

AB1173\_13C

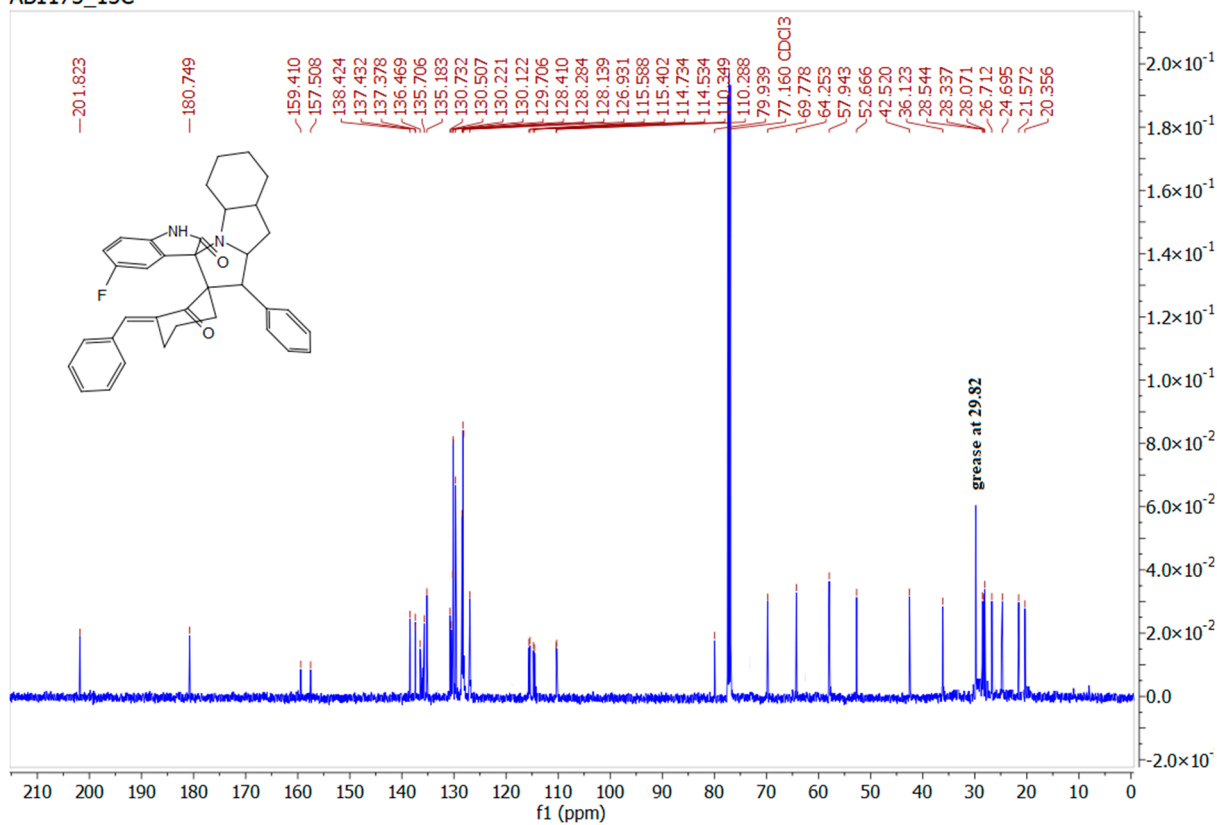



**Figure S4:**  $^1\text{H}$ -NMR and  $^{13}\text{C}$ -NMR for compound-4d

AB1174\_1H

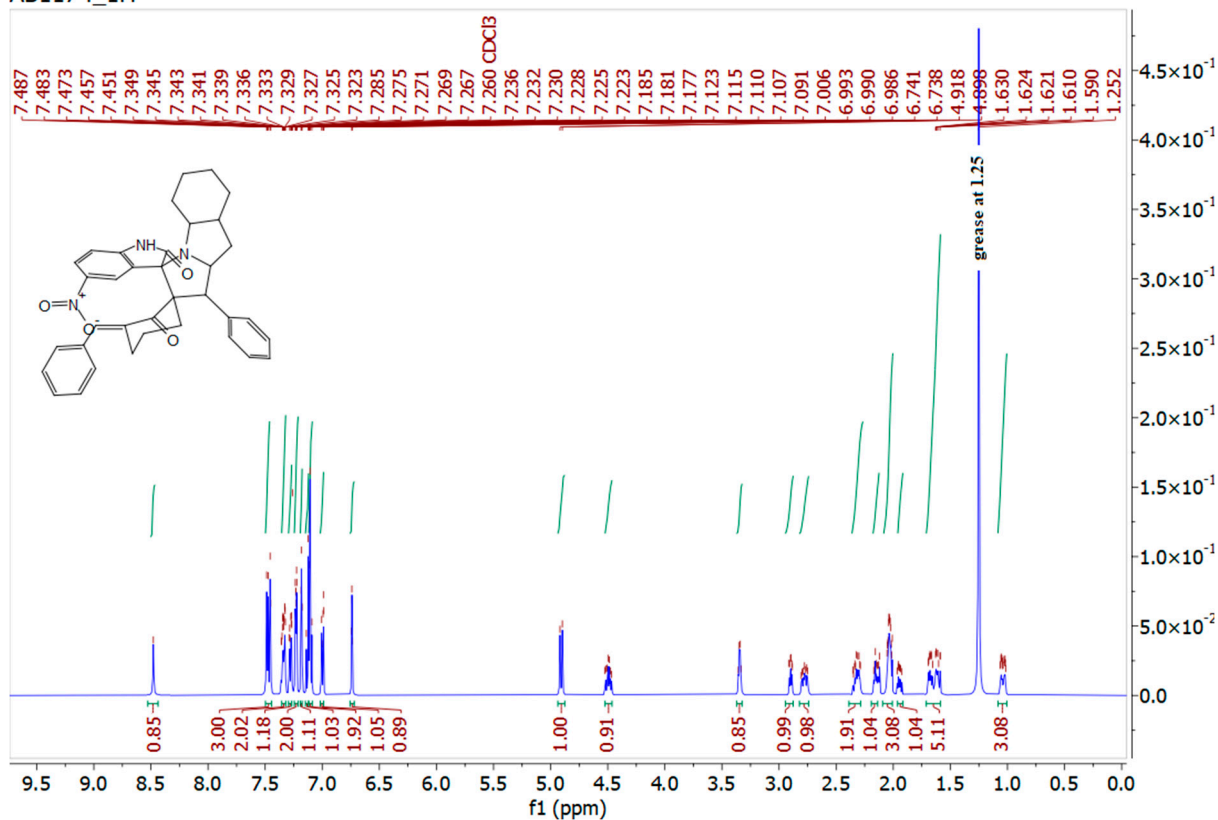

AB1174\_13C

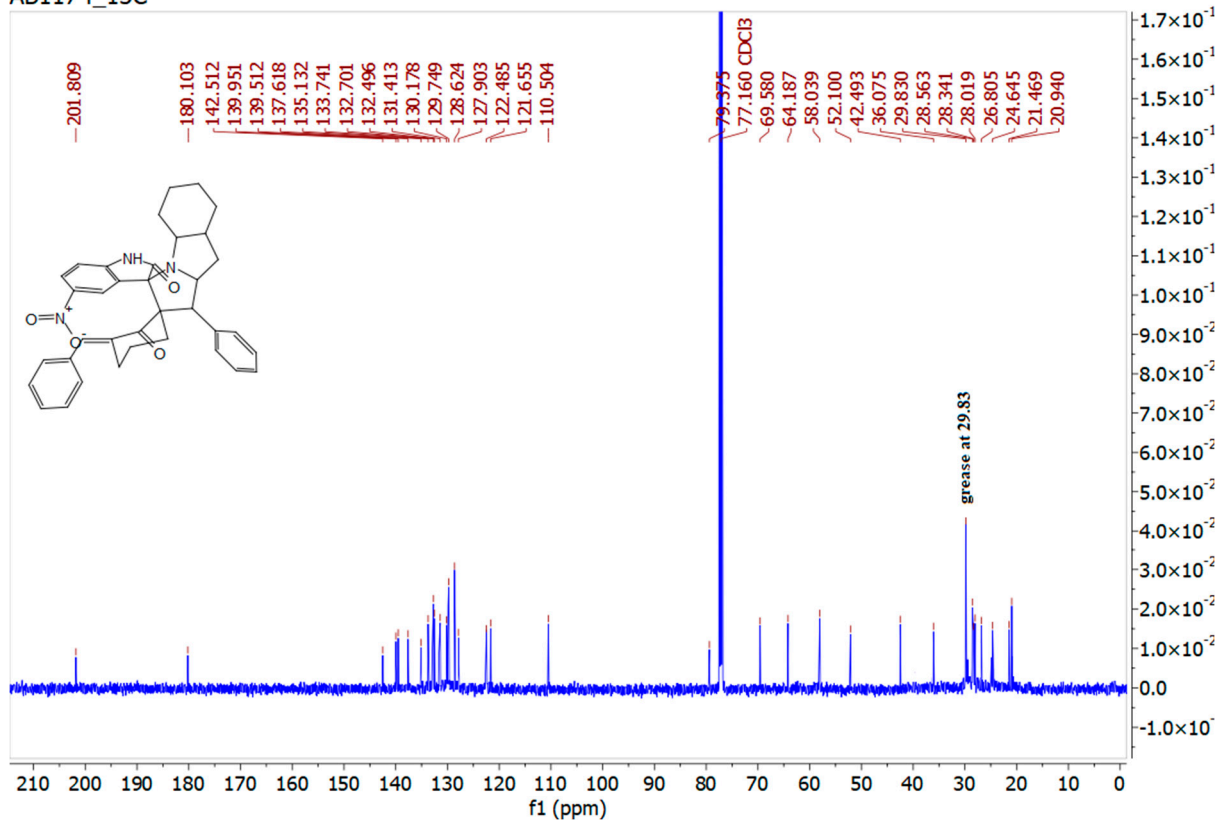

**Figure S5:**  $^1\text{H}$ -NMR and  $^{13}\text{C}$ -NMR for Compound-4e

AB1175\_1H

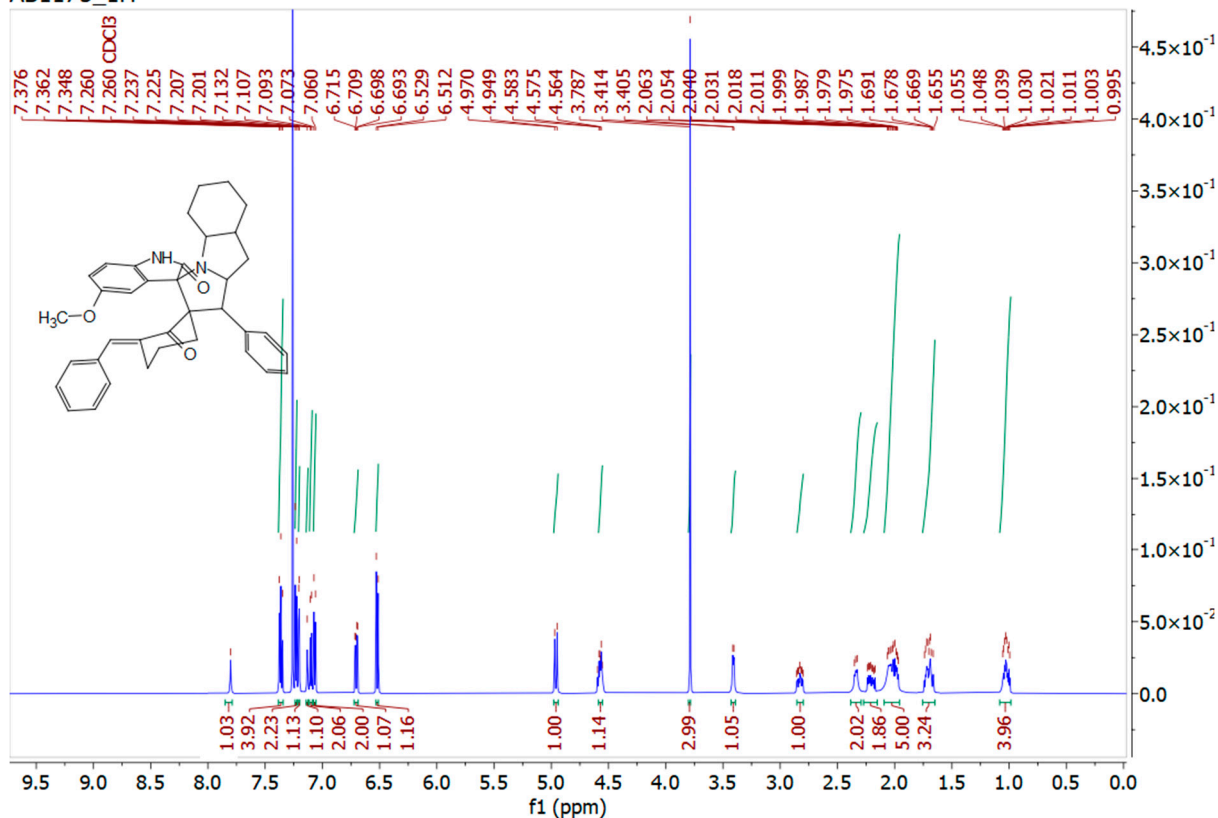

AB1175\_13C

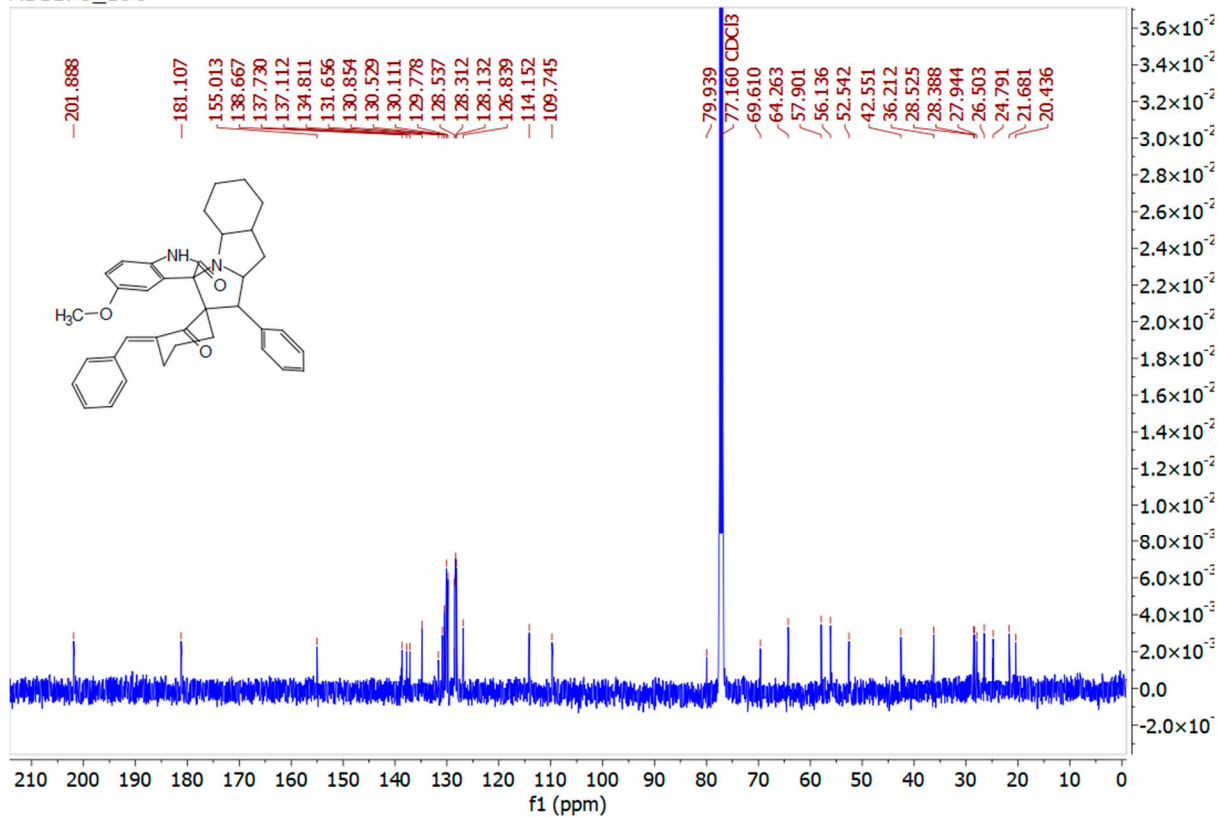

**Figure S6:**  $^1\text{H}$ -NMR and  $^{13}\text{C}$ -NMR for compound-4f

AB1178\_1H

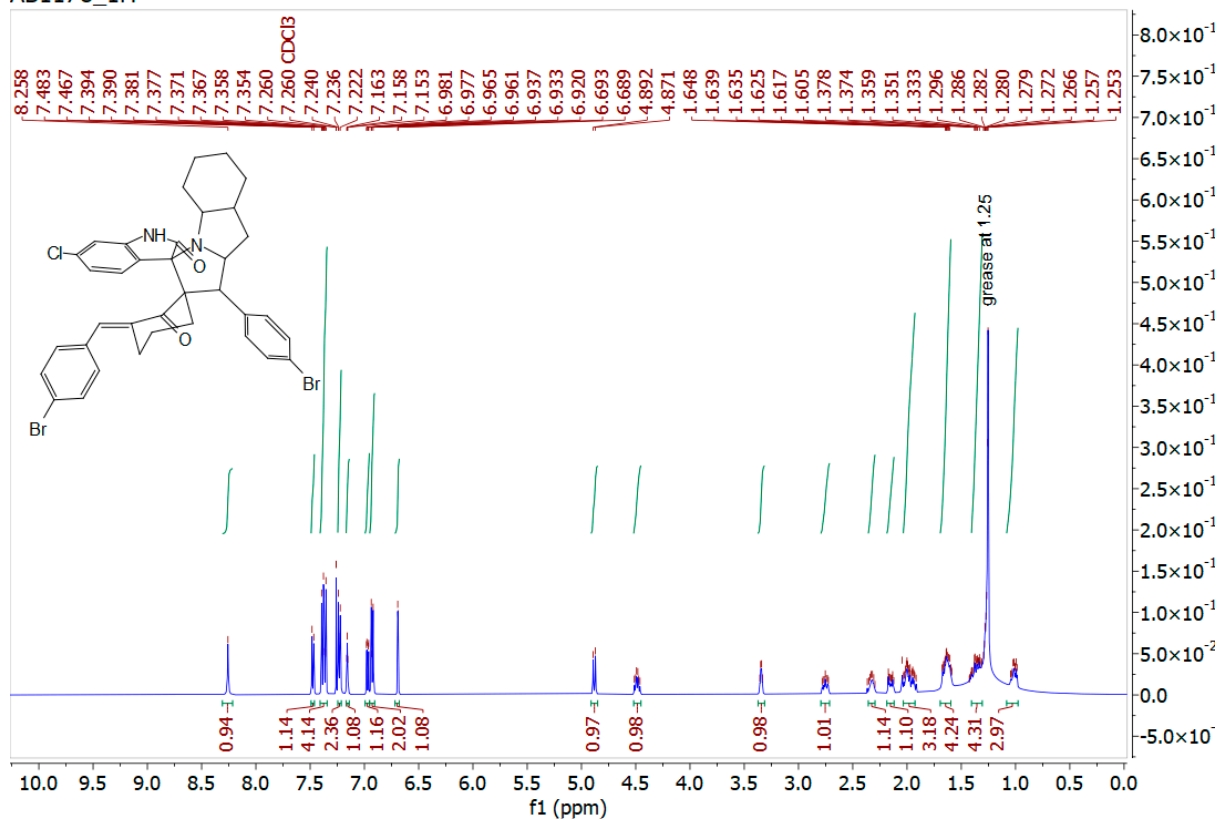

AB1178\_13H

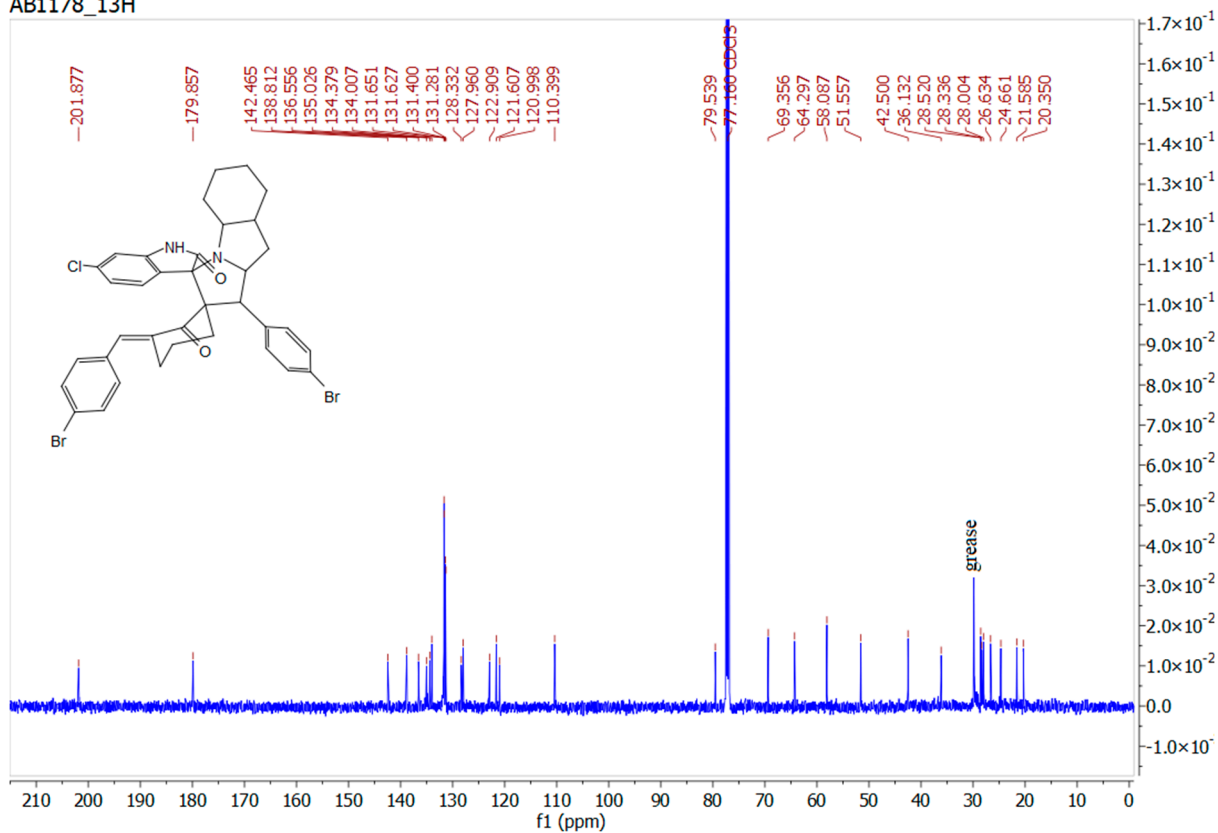

**Figure S7:**  $^1\text{H}$ -NMR and  $^{13}\text{C}$ -NMR for compound-4g

AB1179\_1H

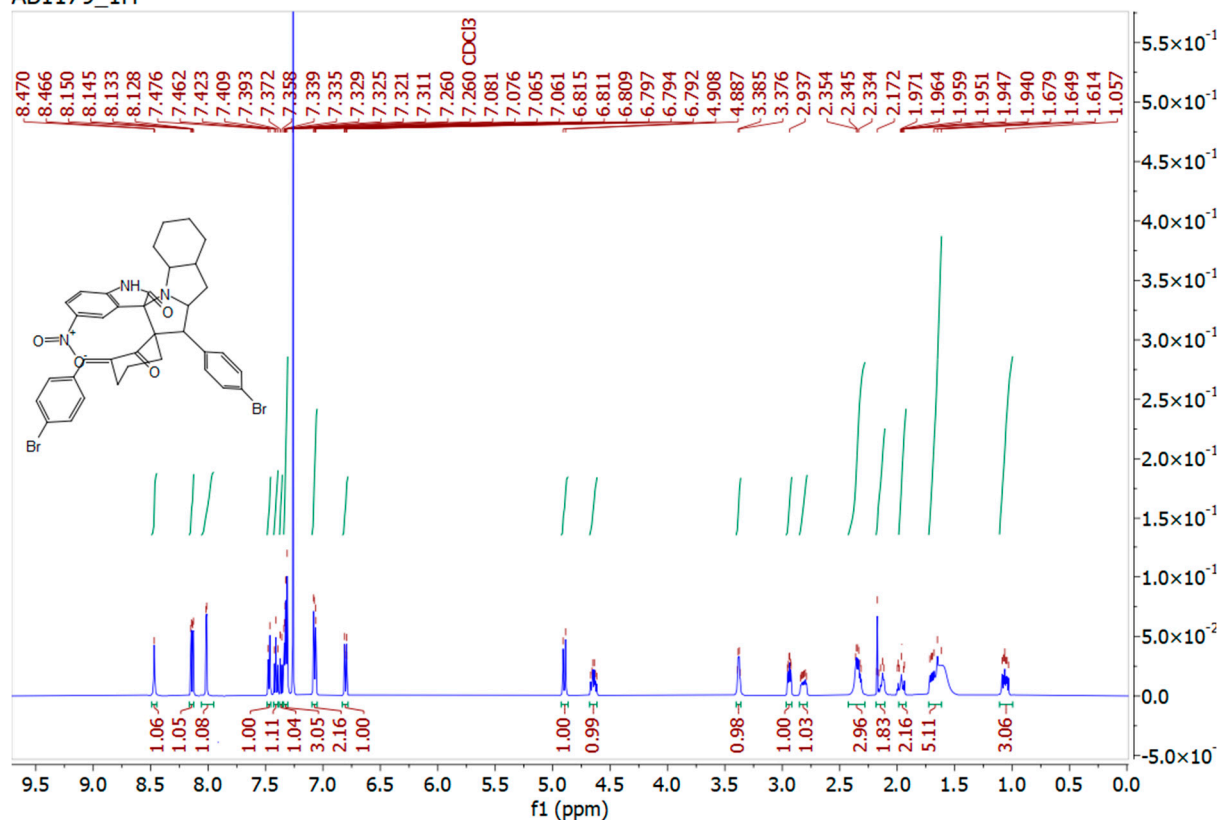

AB1179\_13C

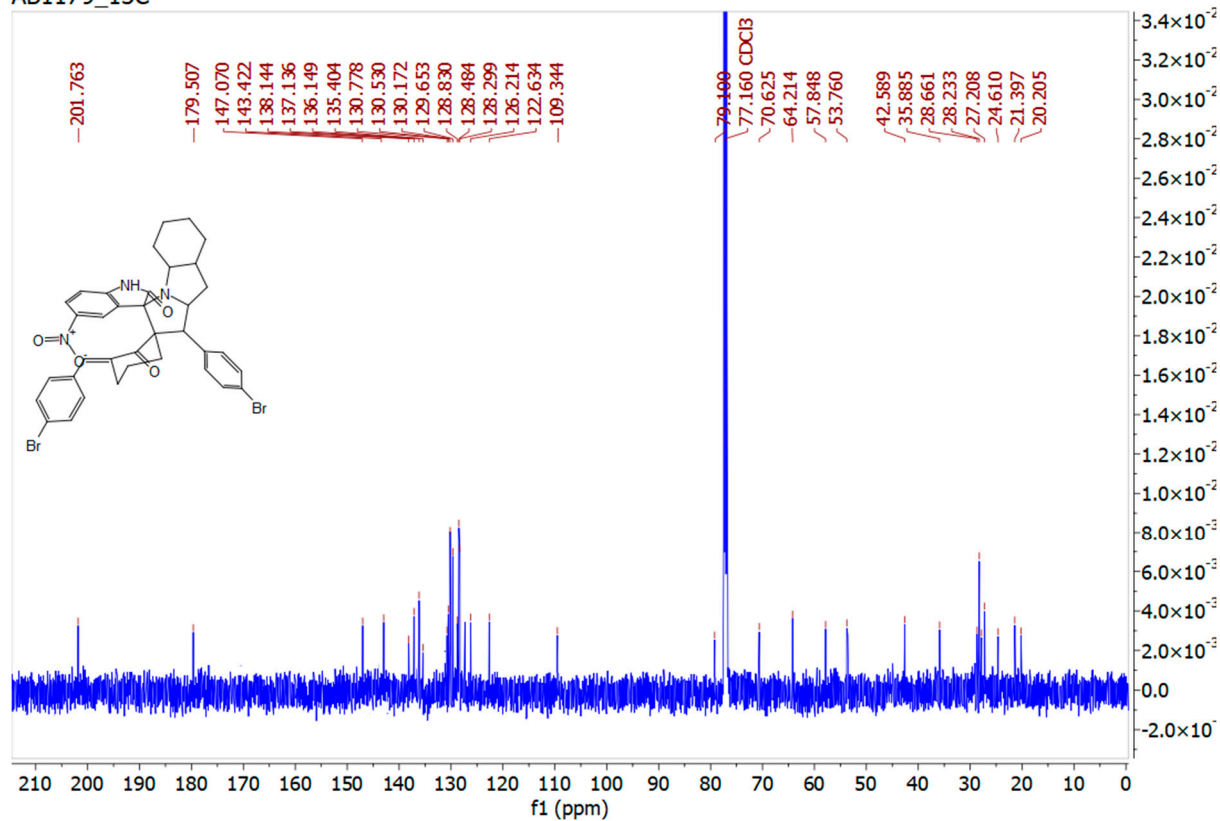

**Figure S8:**  $^1\text{H}$ -NMR and  $^{13}\text{C}$ -NMR for compound-4h

AB1181\_1H

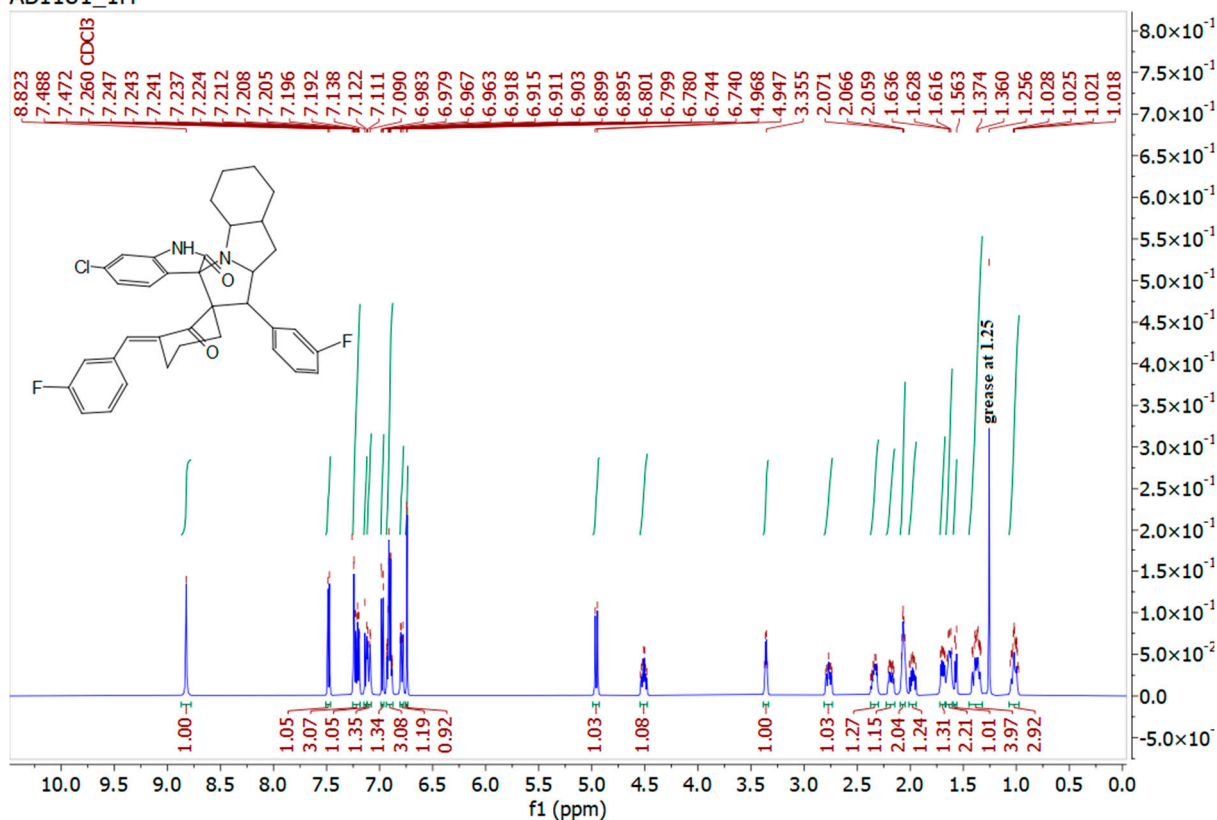

AB1181\_13C

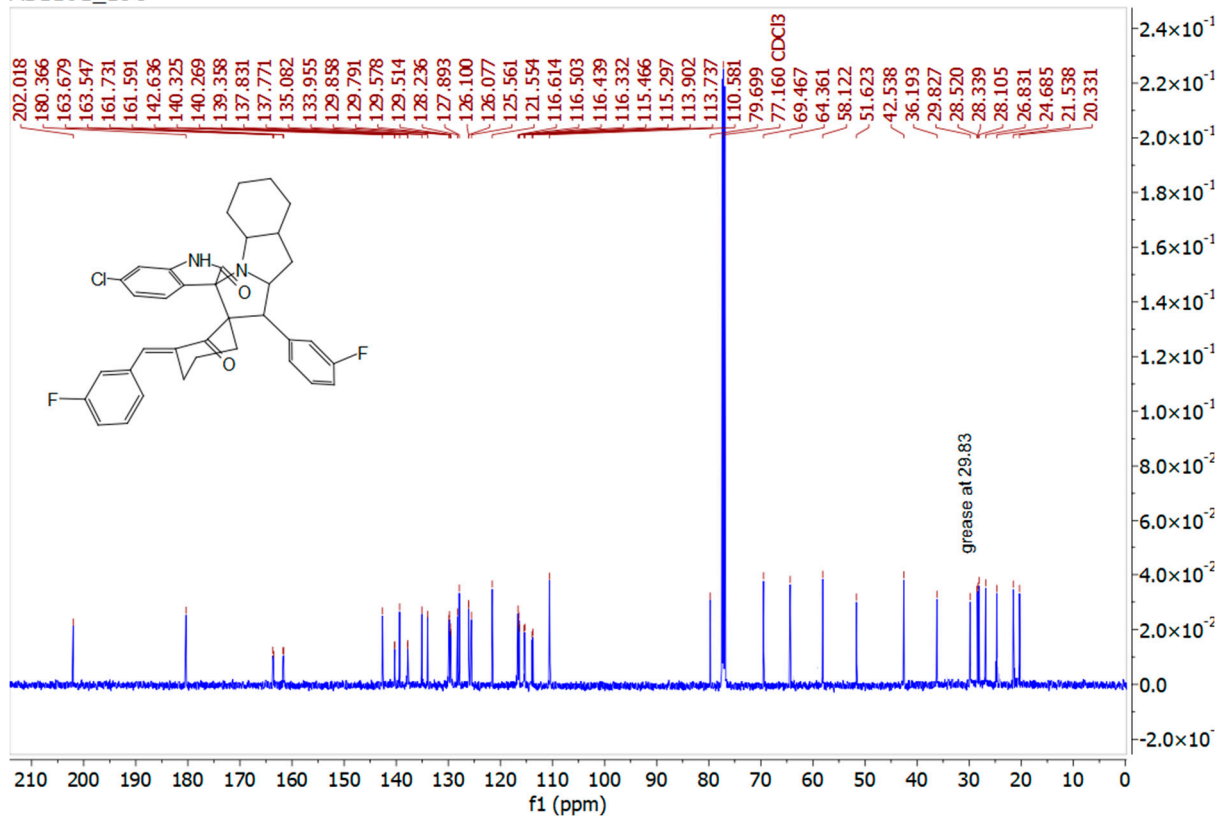



AB1182\_1H

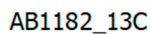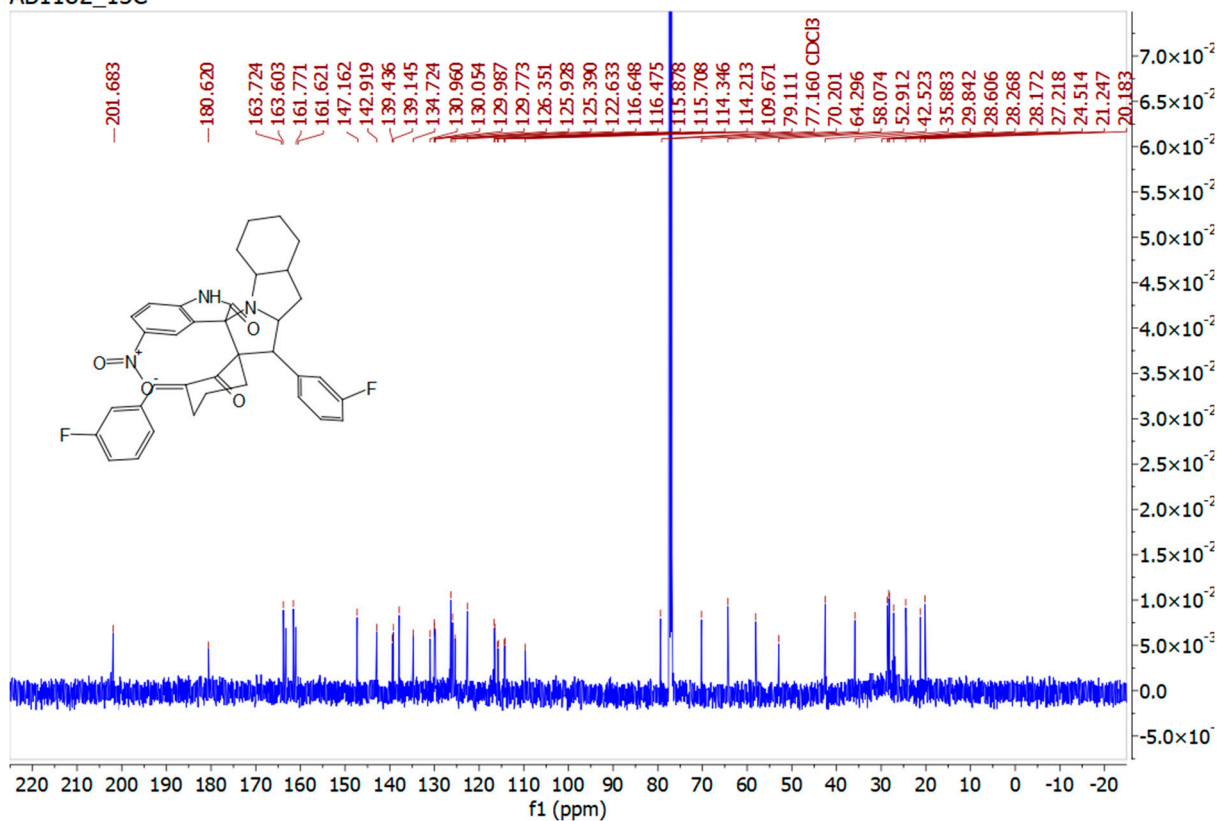

**Figure S10:**  $^1\text{H}$ -NMR and  $^{13}\text{C}$ -NMR for Compound-4j

AB1183\_1H

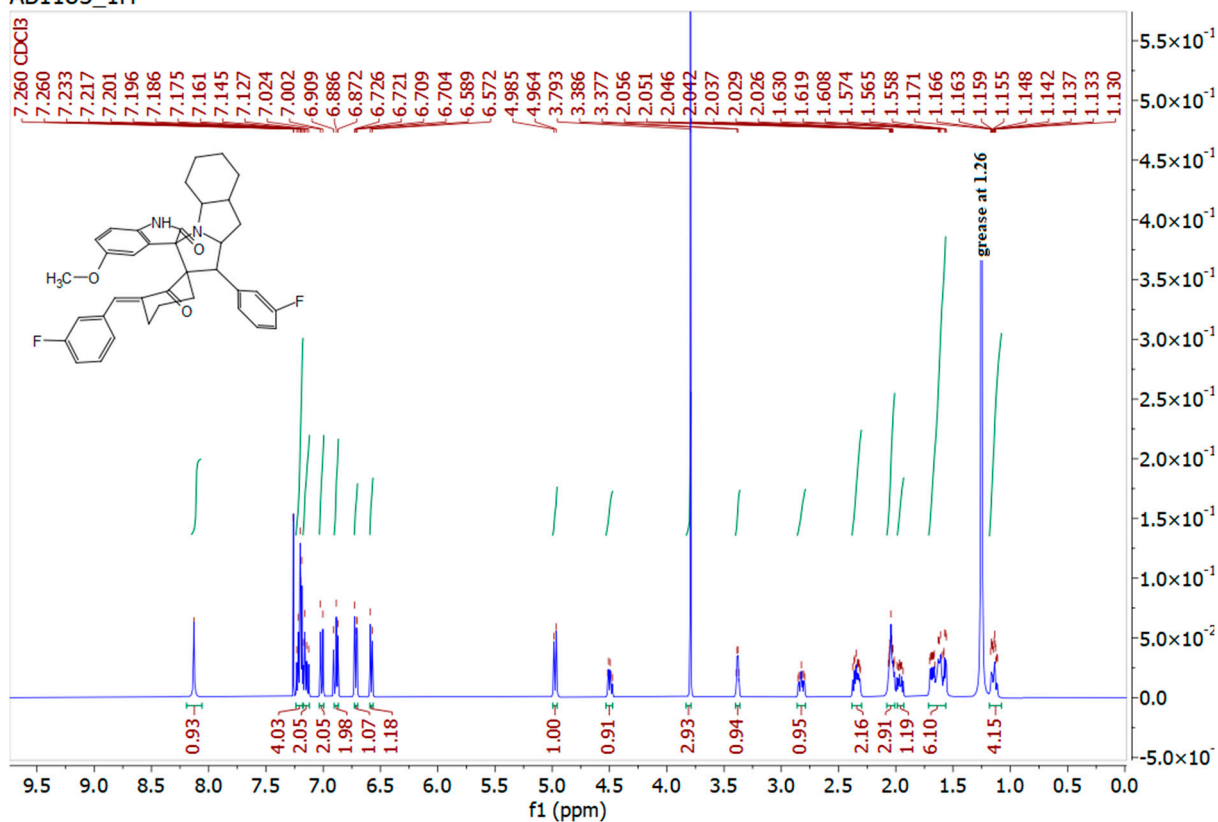

AB1183\_13C

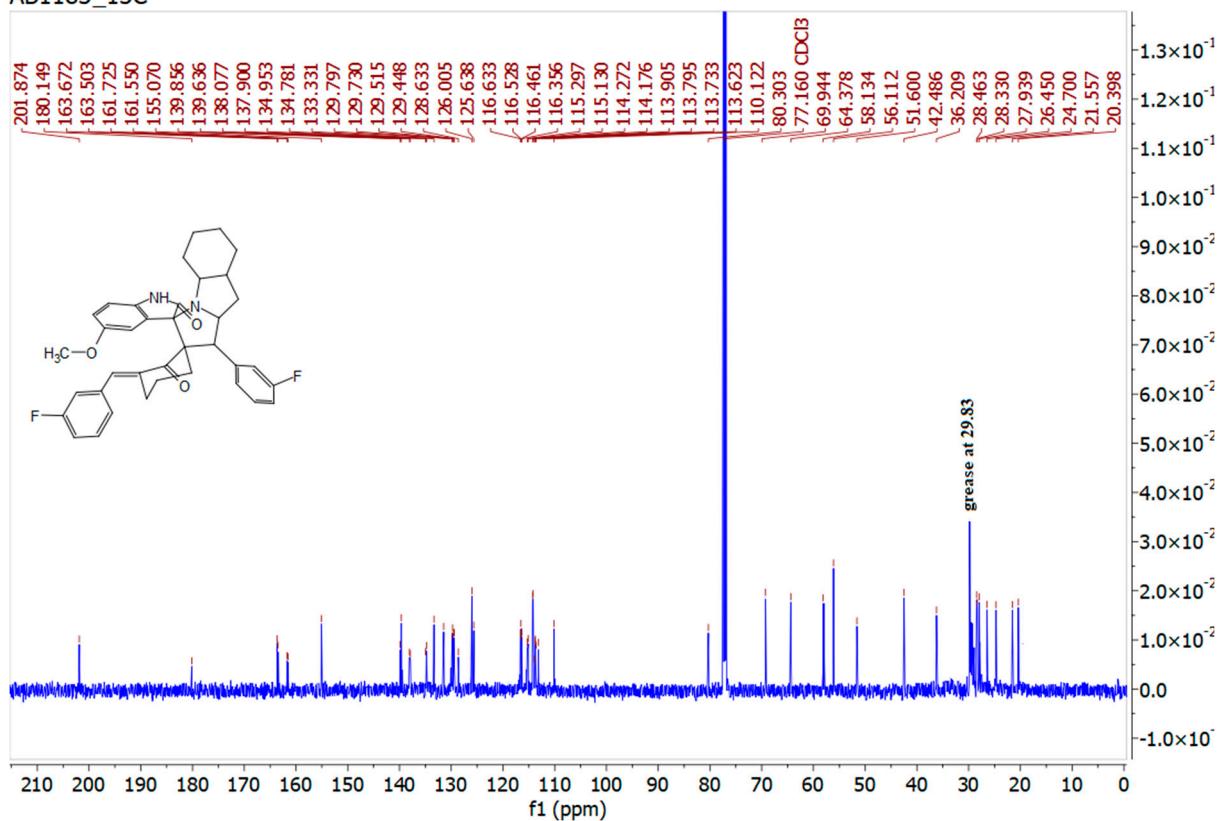

**Figure S11:**  $^1\text{H}$ -NMR and  $^{13}\text{C}$ -NMR for compound-4k

AB1184\_1H

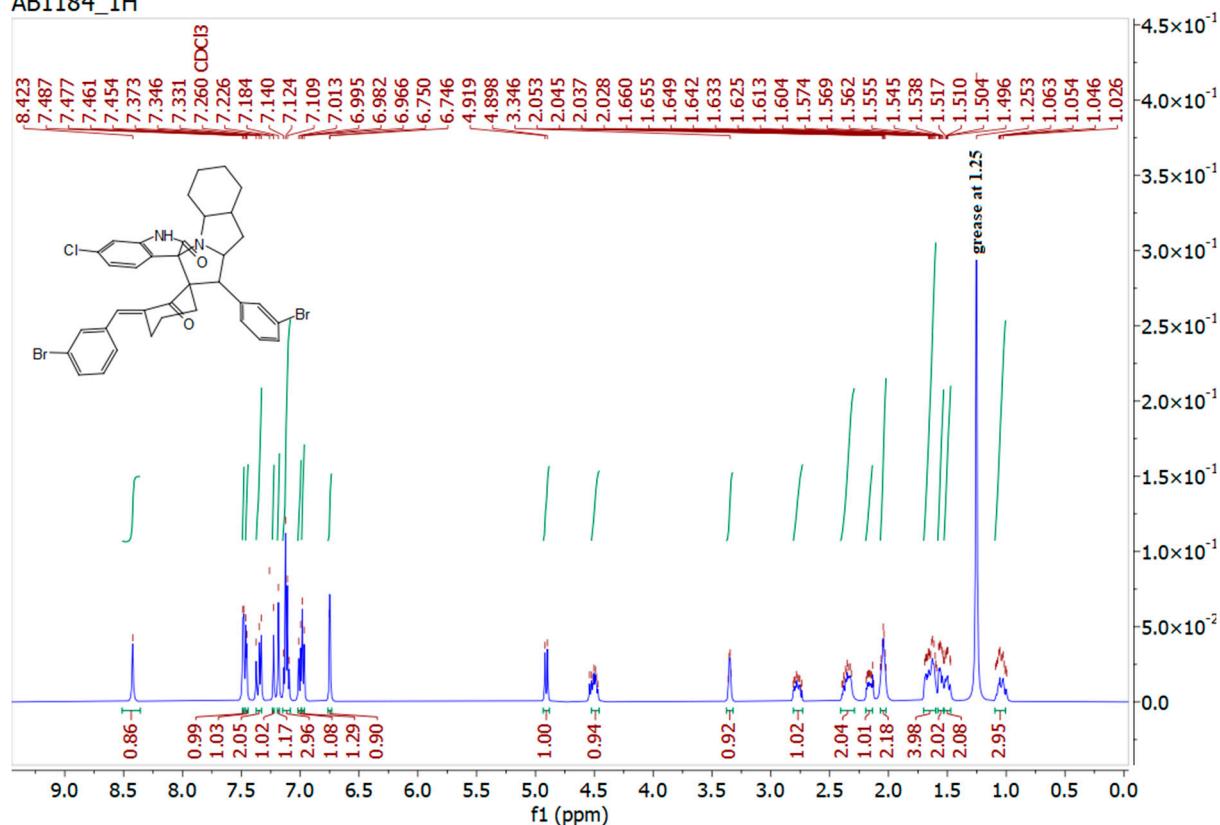

AB1184\_13C

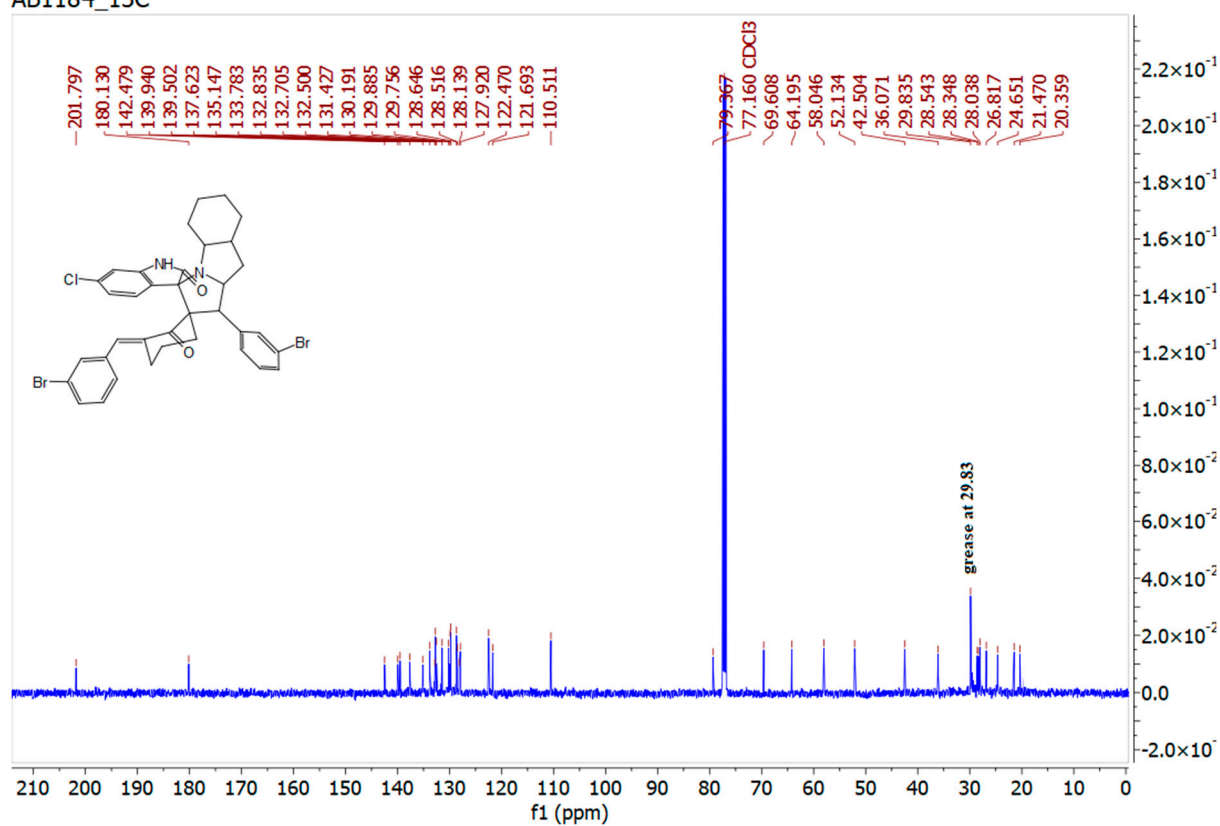



**Figure S12:**  $^1\text{H}$ -NMR and  $^{13}\text{C}$ -NMR for compound-41

AB1187\_1H

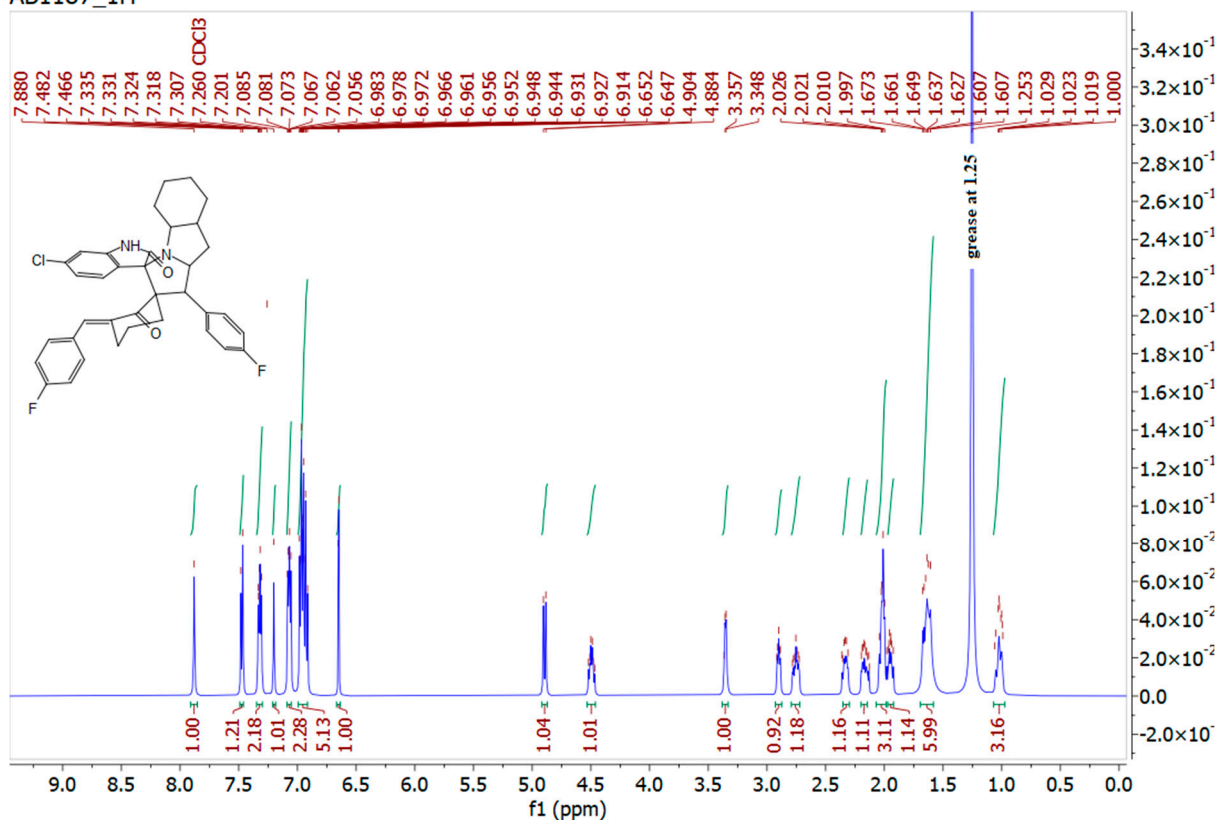

AB1187\_13C

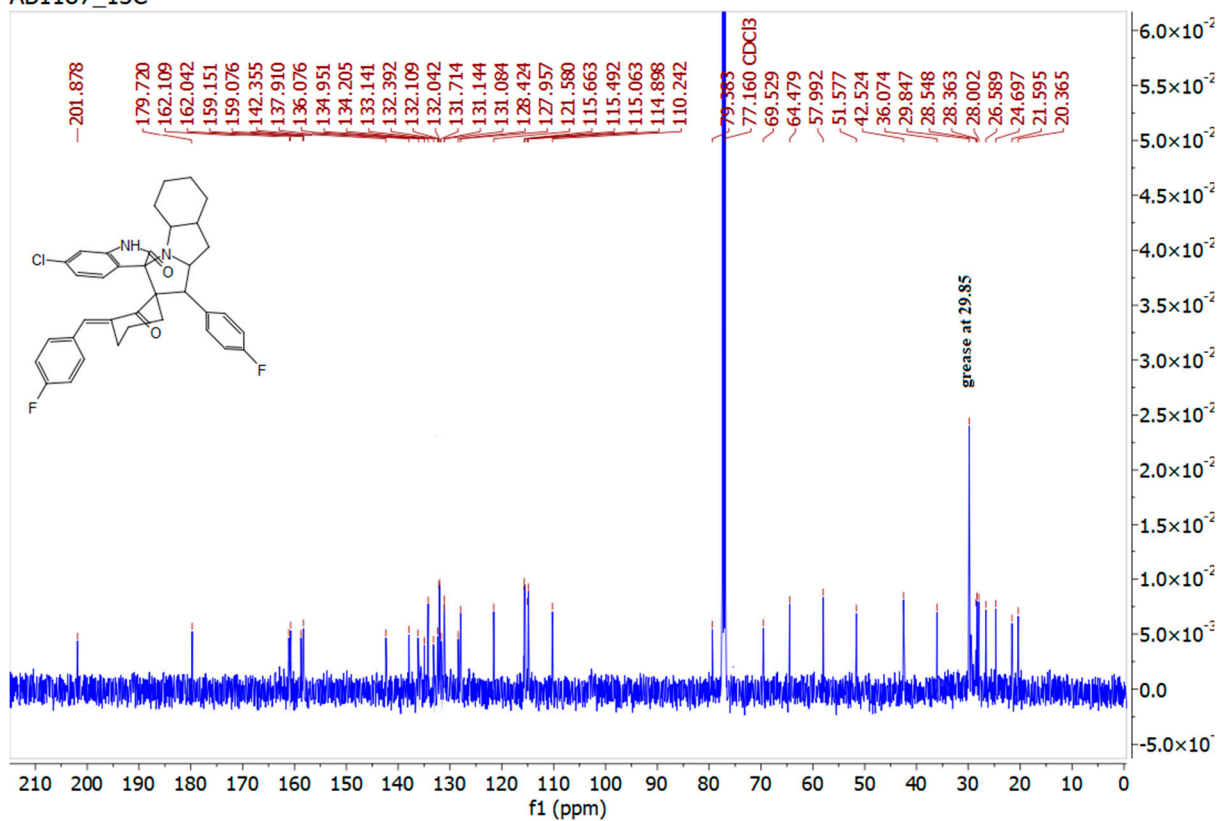

**Figure S13:**  $^1\text{H}$ -NMR and  $^{13}\text{C}$ -NMR for compound-4m

AB1188\_1H

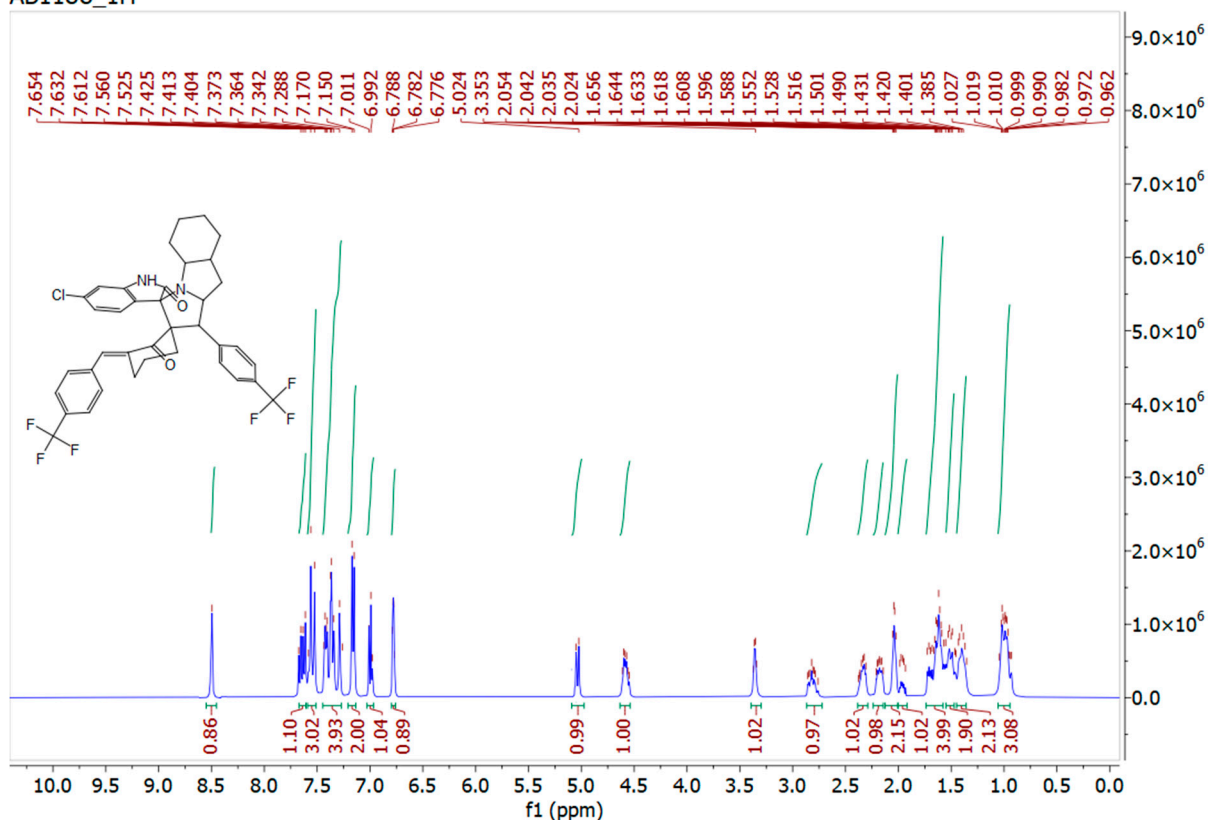

AB1188\_13C

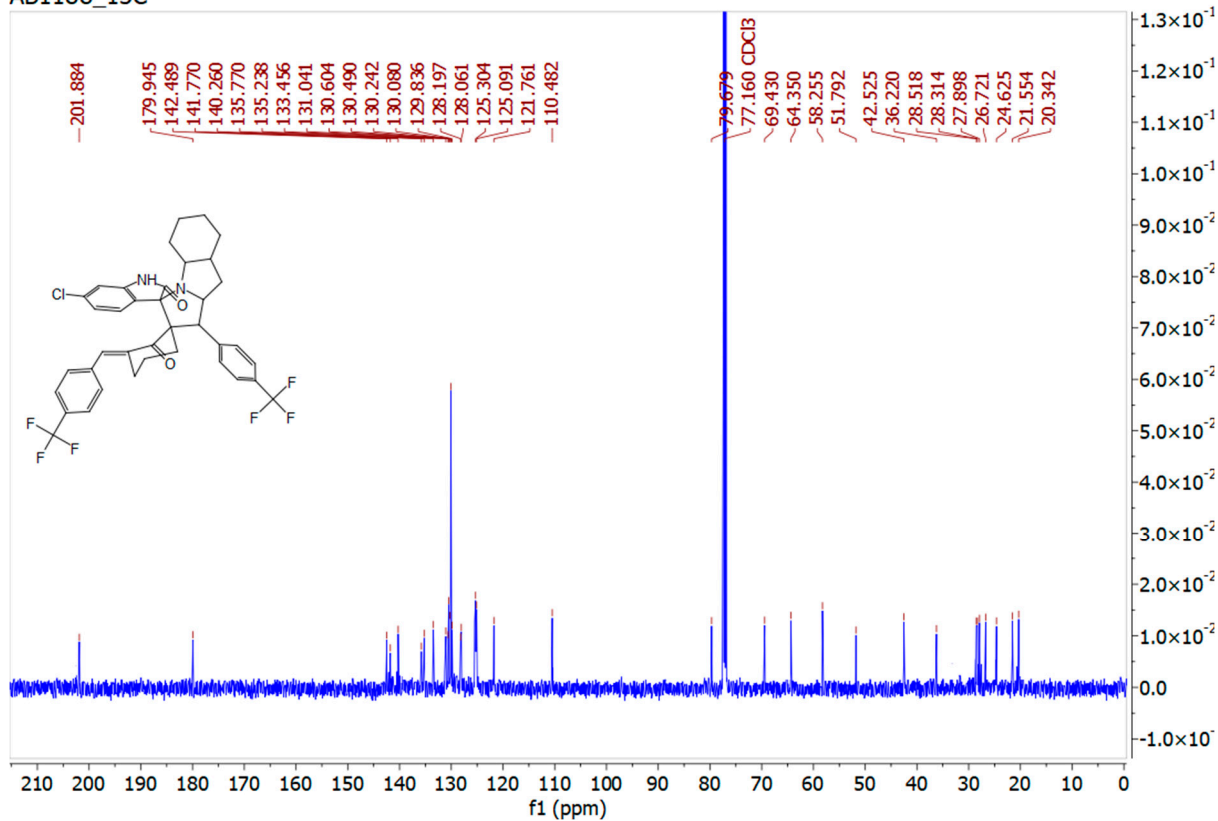

**Figure S14:**  $^1\text{H}$ -NMR and  $^{13}\text{C}$ -NMR for compound-4n

AB1189\_1H

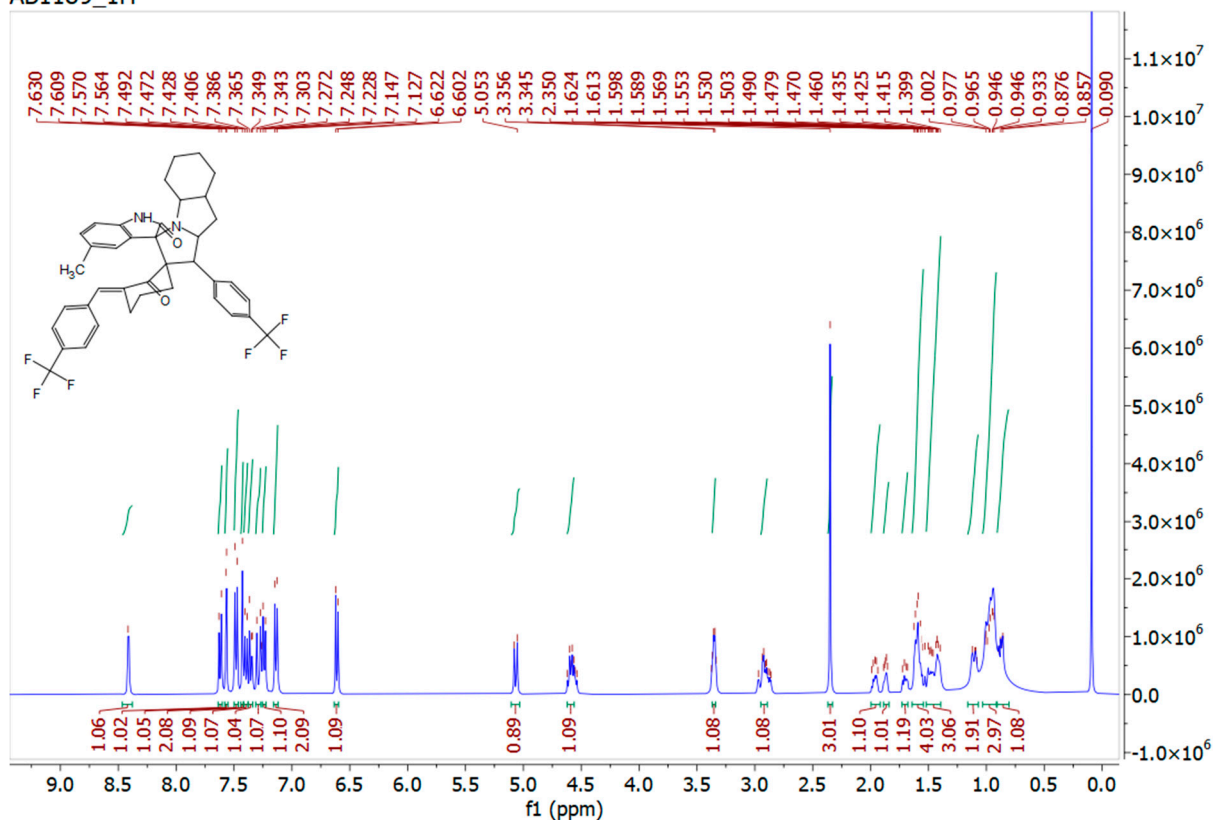

AB1189\_13C

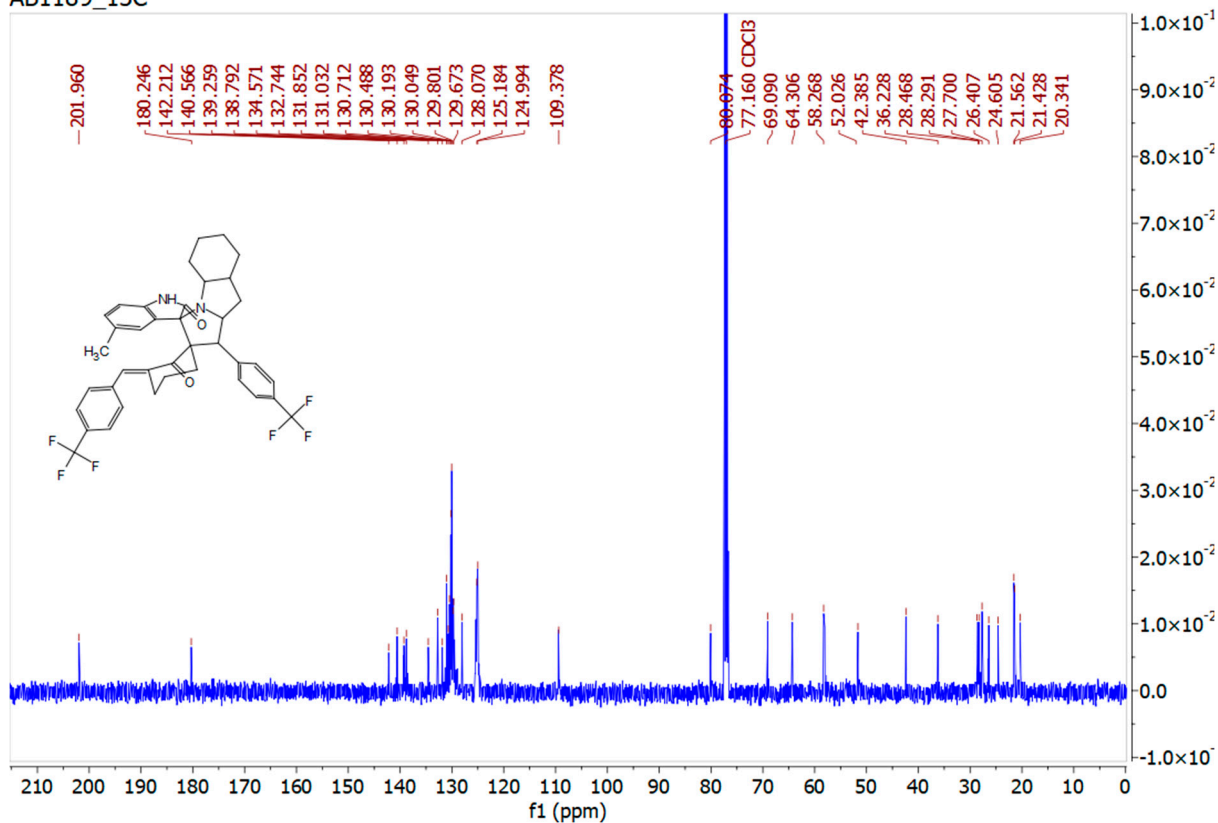

# 1D- &2D-NMR deep investigation for compound 4f

**Figure S15:**  $^1\text{H}$ -NMR and  $^{13}\text{C}$ -NMR for compound-4f

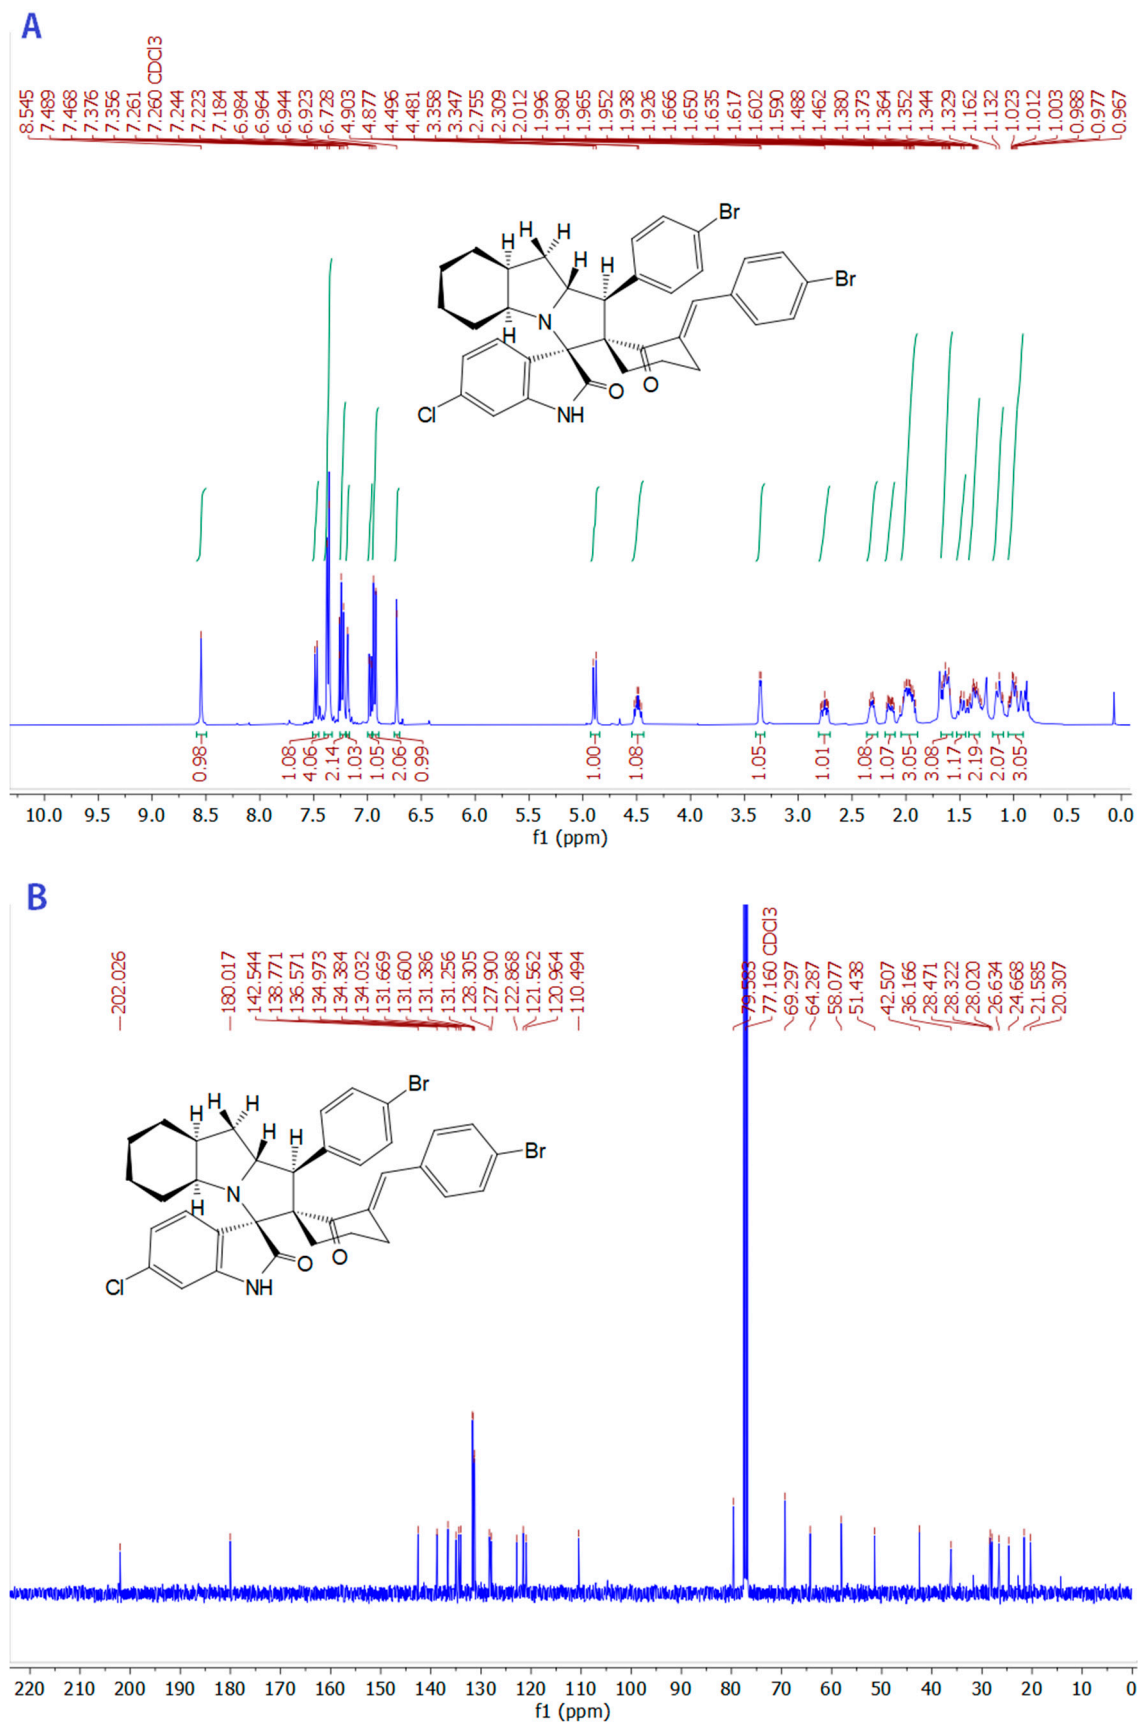

**Figure S16:** DEPT-135- NMR for compound **4f** expanded aliphatic region.

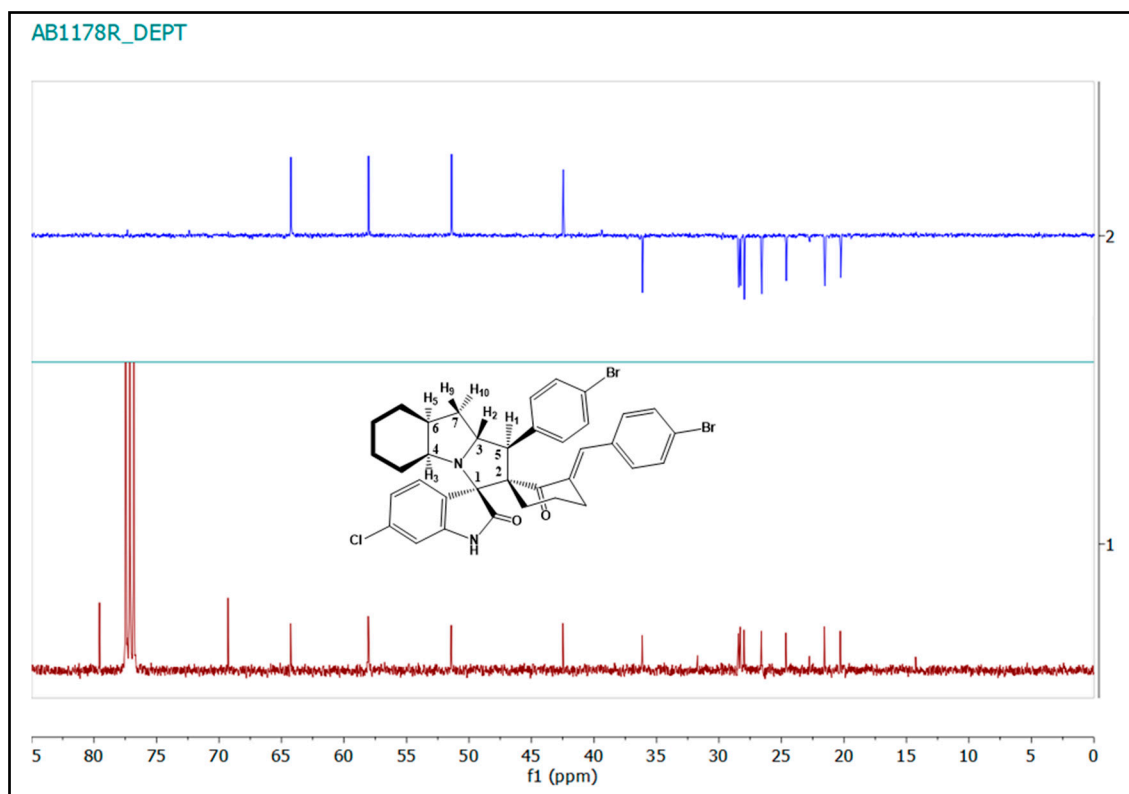



**Figure S17:** HMQC- NMR for compound **4f** more expanded aliphatic region.

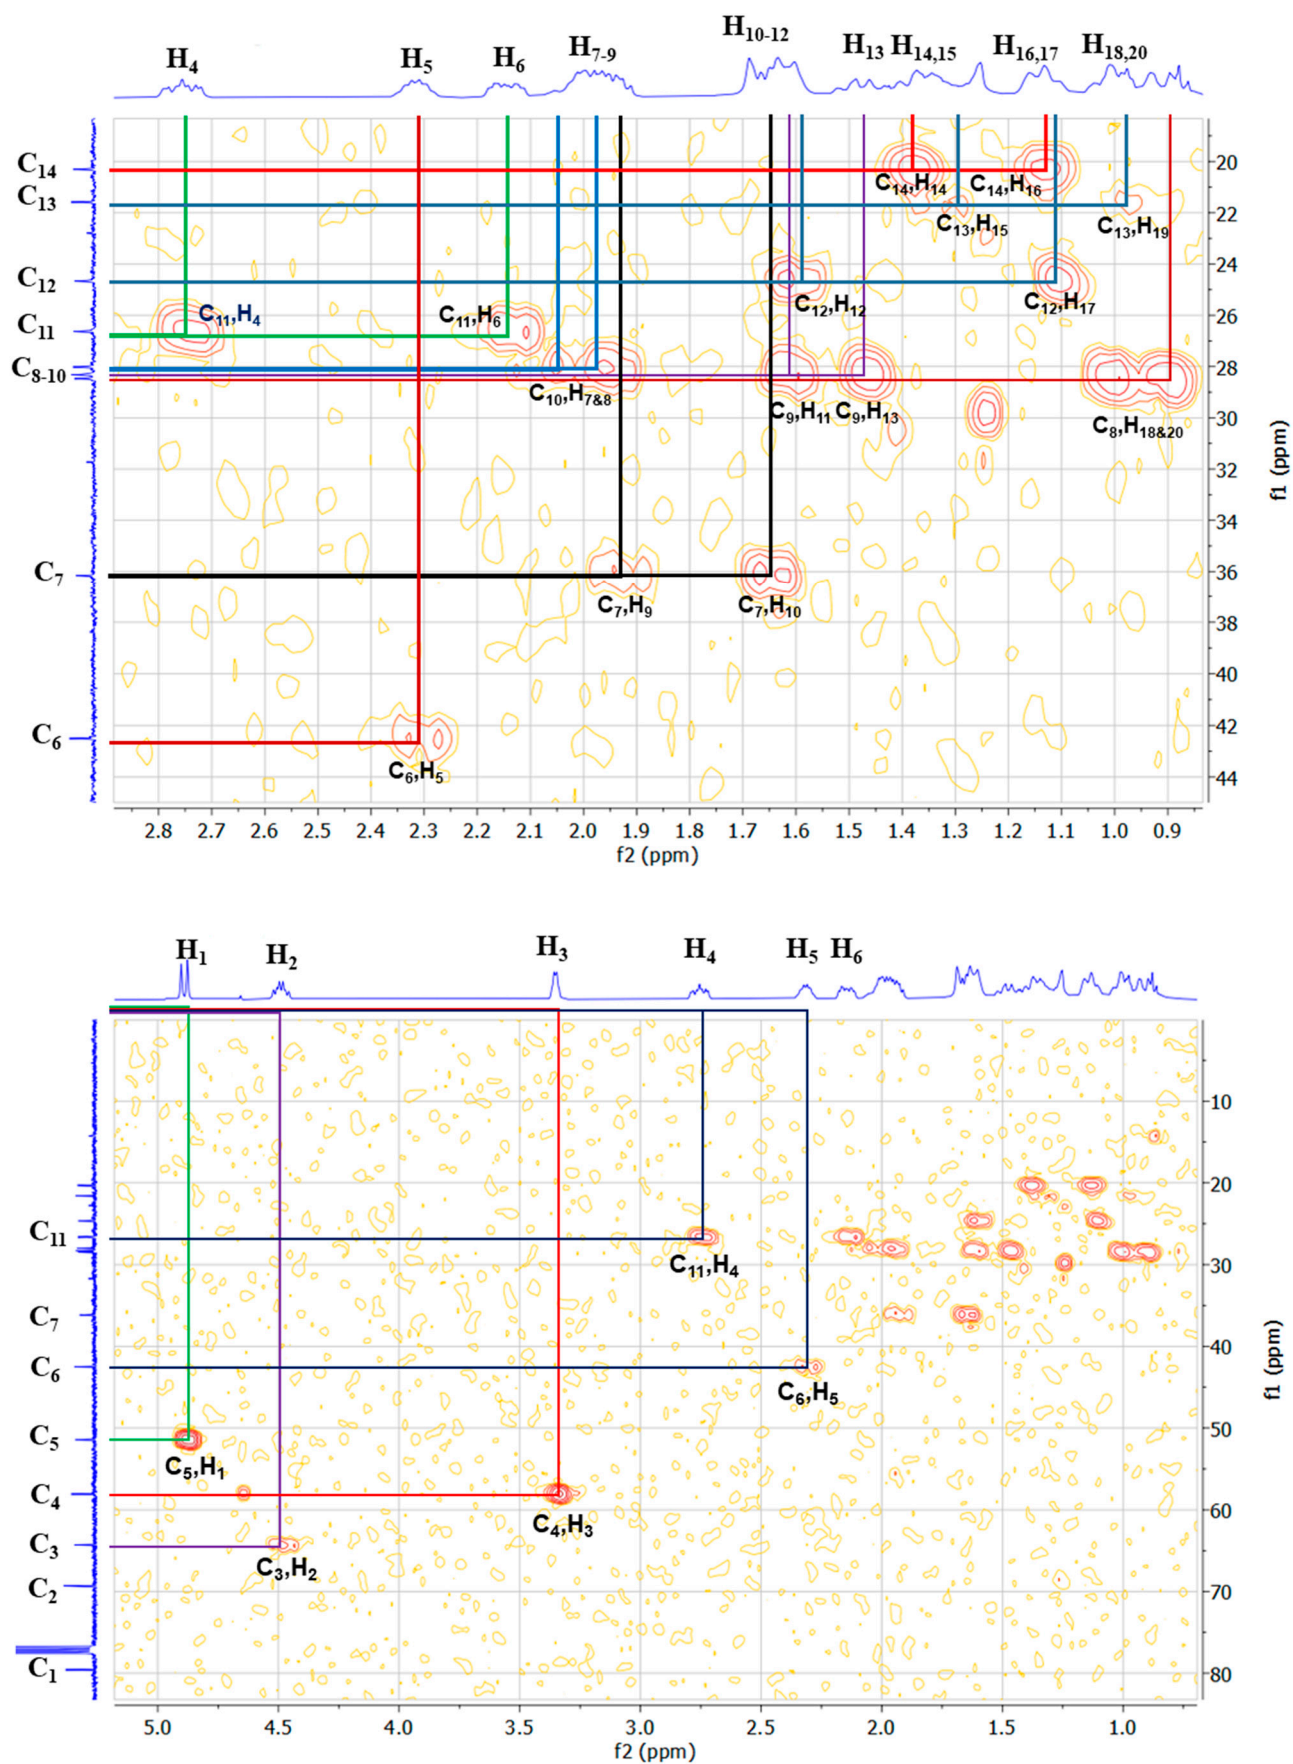

**Figure S18:** COSY- NMR for compound **4f** more expanded aliphatic region.

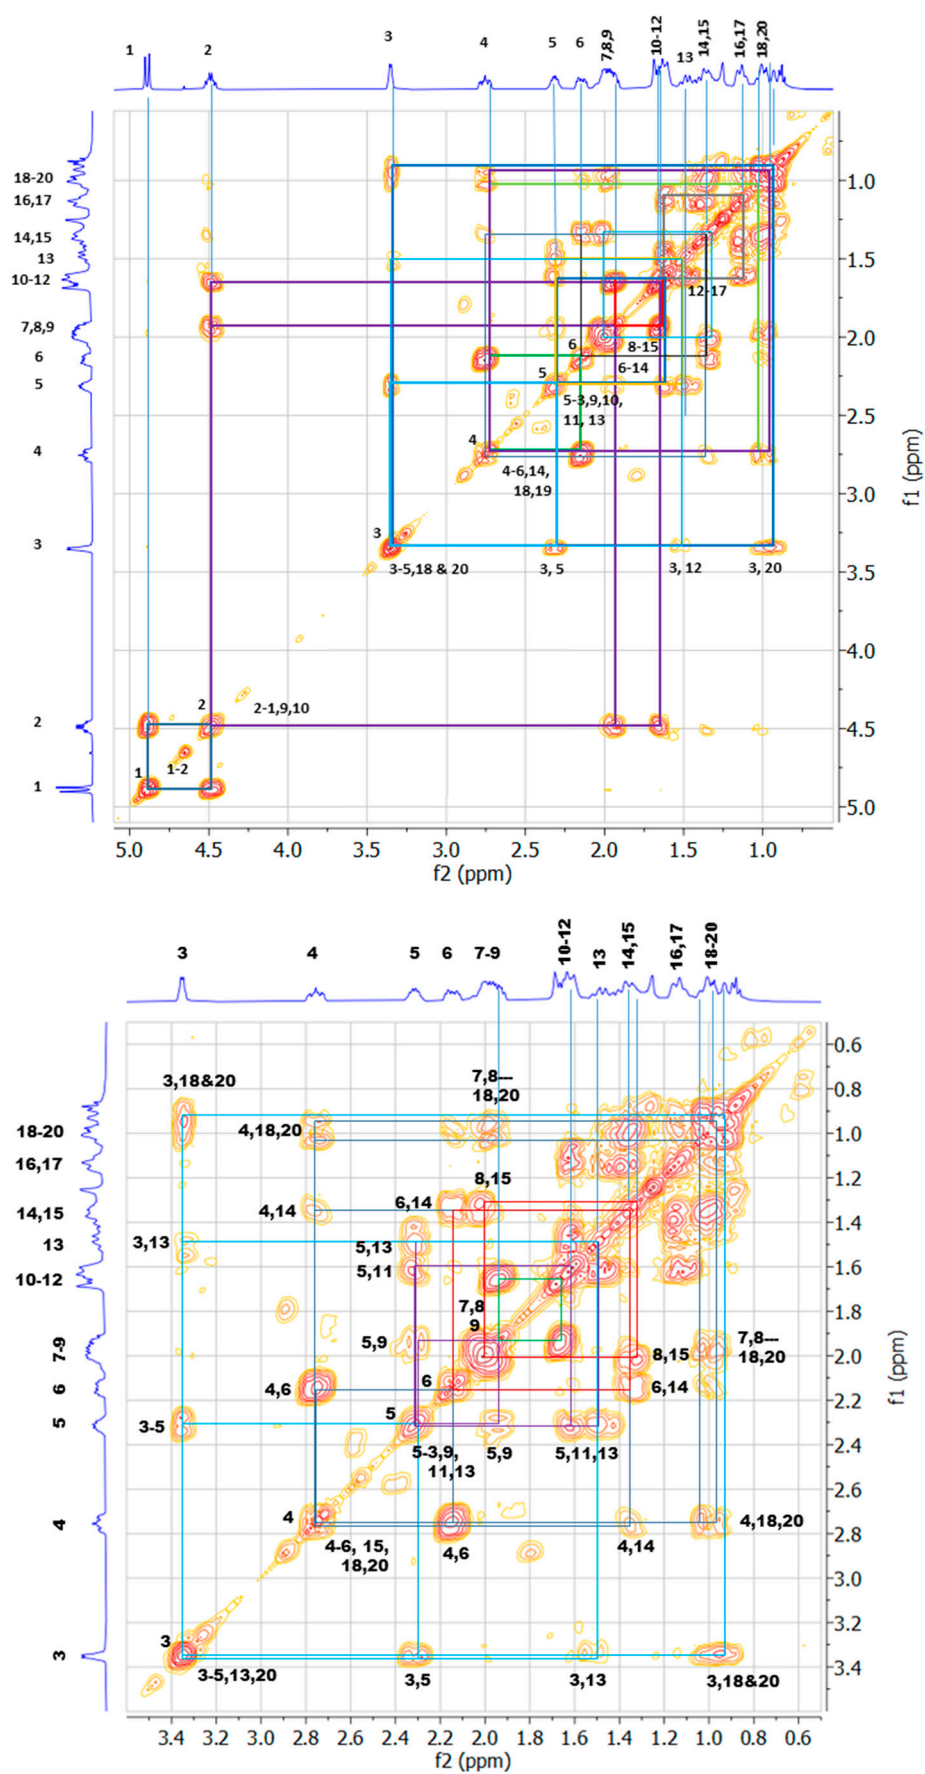

**Figure S19:** HMBC- NMR for compound **4f**.

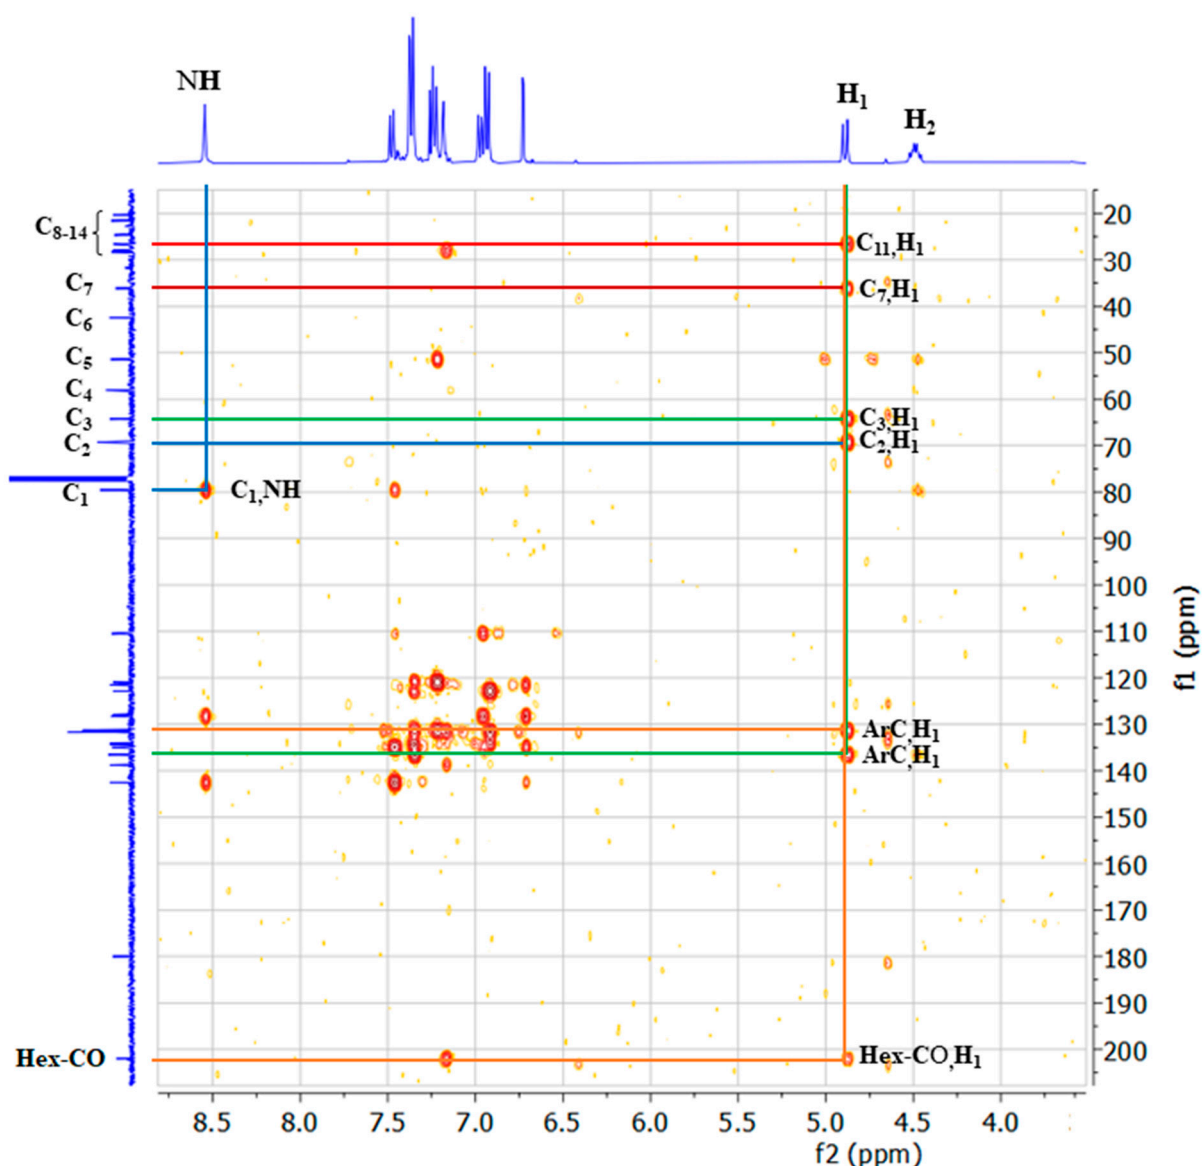

### The Biological Activity Assays Protocols

Cytotoxic activity of compounds was evaluated in 96-well flat-bottomed micro plates by using the standard MTT (3-[4, 5-dimethylthiazole-2-yl]-2, 5-diphenyl-tetrazolium bromide) colorimetric assay. For this purpose, PC3 cells (Prostate Cancer) / BJ *Human fibroblast* cells / HeLa cells (Cervical Cancer) / MCF-7 and MDA-MB-231 breast cancer cell line were cultured in Dulbecco's Modified Eagle Medium, supplemented with 5% of fetal bovine serum (FBS), 100 IU/ml of penicillin and 100 µg/ml of streptomycin in 75 cm<sup>2</sup> flasks, and kept in 5% CO<sub>2</sub> incubator at 37°C. Exponentially growing cells were harvested, counted with haemocytometer and diluted with a particular medium. Cell culture with the concentration of 1×10<sup>5</sup> cells/ml was prepared and introduced (100 µL/well) into 96-well plates. After overnight incubation, medium was removed and 200 µL of fresh medium was added with different concentrations of compounds (1-30µM). After 48 hrs, 200 µL MTT (0.5 mg/ml) was added to each well and incubated further for 4 hrs. Subsequently, 100µL of DMSO was added to each well. The extent of MTT reduction to formazan within cells was calculated by measuring the absorbance at 570 nm, using a micro plate reader (Spectra Max plus, Molecular Devices, CA, USA). The cytotoxicity was recorded



as concentration causing 50% growth inhibition (IC<sub>50</sub>) for PC3 cells. The percent inhibition was calculated by using the following formula:

$$\% \text{ inhibition} = 100 - ((\text{mean of O.D of test compound} - \text{mean of O.D of negative control}) / (\text{mean of O.D of positive control} - \text{mean of O.D of negative control}) * 100).$$

The results (% inhibition) were processed by using Soft- Max Pro software (Molecular Device, USA).

#### **STANDARD DRUG:**

Standard drug used in the MTT assay was doxorubicin.

#### **References**

1. Foye, W.O.; Lemke, T.L.; Williams, D.A. *Principles of Medicinal Chemistry*, 4th Ed., Williams and Wilkins, Philadelphia, PA, USA, 2002; pp. 822.
2. Mannerström, M.; Toimela, T.; Sarkanen, J.-R.; Heinonen, T. Human BJ Fibroblasts is an Alternative to Mouse BALB/c 3T3 Cells in In Vitro Neutral Red Uptake Assay. *Basic Clin. Pharmacol. Toxicol.* **2017**, *121*, 109–115, doi:10.1111/bcpt.12790.
3. Price, P.; McMillan, T.J. Use of the tetrazolium assay in measuring the response of human tumor cells to ionizing radiation. *Cancer Research* **1990**, *50*, 1392–1396. Retrieved from <https://cancerres.aacrjournals.org/content/canres/50/5/1392.full.pdf>. (access date: 1 June 2020).
4. Scudiero, D. A.; Shoemaker, R.H.; Paull, K.D.; Monks, A.; Tierney, S.; Nofziger, T.H.; Currens, M.J.; Seniff, D.; Boyd, M.R. Evaluation of a soluble tetrazolium/formazan assay for cell growth and drug sensitivity in culture using human and other tumor cell lines. *Cancer Res.* **1988**, *48*, 4827–4833.
5. Mosmann, T. Rapid colorimetric assay for cellular growth and survival: Application to proliferation and cytotoxicity assays. *J. Immunol. Methods* **1983**, *65*, 55–63, doi:10.1016/0022-1759(83)90303-4.
